# Supplementary material for: Neuroendocrinology of the lung revealed by single-cell RNA sequencing
Source: eLife. 2022 Dec 5;11:e78216. doi: 10.7554/eLife.78216 (PMC9721618; doi:10.7554/eLife.78216)
Supplement: Figure 1—source data 1. [file elife-78216-fig1-data1.xlsx]

## Sheet: Fig1G_SourceData
Source Data Fig. 1. Number of PNECs expressing peptidergic genes by smFISH*
	Scg5	Calca	Chga	Cartpt	Agt	Pomc	Nmb	Adcyap1
ISH > 0 puncta	99	97	95	67	54	39	36	35
ISH>5 puncta	97	97	68	26	14	11	3	1
scRNAseq	95	95	60	34	16	2	1	2
*Values indicate # PNECs of 100 scored cells by smFISH and by scRNAseq
ISH (in situ hybridization)
