# Supplementary material for: Neuroendocrinology of the lung revealed by single-cell RNA sequencing
Source: eLife. 2022 Dec 5;11:e78216. doi: 10.7554/eLife.78216 (PMC9721618; doi:10.7554/eLife.78216)
Supplement: Supplementary file 6. — (a) Mechanical. (b) Thermal. (c) Mrgprs. (d) Acid. (e) Oxygen. (f) CO2. (g) TRP family. (h) Olfactory. (i) Pheromone. (j) Taste. (k) K2P channels. (l) Kv channels. [file elife-78216-supp6.xlsx]

## Sheet: S6a - Mechanical
Table S6. Sensory genes (mouse)
Mouse gene symbol	Name (description**)
Fam38a	Piezo-type mechanosensitive ion channel component 1
Fam38b*	Piezo-type mechanosensitive ion channel component 2
Casr*	Calcium-sensing receptor (reported mechanotransducer in NEBs)
Trpc1	Transient receptor potential cation channel subfamily C, member 1
Trpc2	Transient receptor potential cation channel subfamily C, member 2
Trpc3	Transient receptor potential cation channel subfamily C, member 3
Trpc4	Transient receptor potential cation channel subfamily C, member 4
Trpc5*	Transient receptor potential cation channel subfamily C, member 5 (reported mechanotransducer in NEBs)
Trpc6	Transient receptor potential cation channel subfamily C, member 6
Kcnk2	TREK-1 (mechanically-activated potassium 2-pore ion channel)
Kcnk4	TRAAK (Mechanically-activated potassium 2-pore ion channel)
Kcnk10	TREK-2 (Mechanically-activated potassium 2-pore ion channel)
Pkd1	Polycystin 1 (cilia mechanotransduction)
Pkd2	Polycystin 2 (cilia mechanotransduction)
Pkd1l1	Polycystin1-like 1. Transient receptor potential interacting (cilia mechanotransduction)
Pkd1l2	Polycystin1-like 2. Transient receptor potential interacting (cilia mechanotransduction)
Tmc1	Transmembrane channel like protein 1 (component of mechanosensitive complex, inner ear hair cells)
Tmc2	Transmembrane channel like protein 2 (component of mechanosensitive complex, inner ear hair cells)
Lhfpl5	Tetraspan membrane protein of hair cell stereocilia (component of mechanosensitive complex, inner ear hair cells)
Tmie	Transmembrane inner ear expressed gene (component of mechanosensitive complex, inner ear hair cells)
Stoml3	Stomatin-like gene (modulates mechanosensitive DRG neurons)
Tmem63a	Homolog of Arabidopsis mechanosensor OSCA (induces stretch-activated currents in heterologus in vitro system)
Tmem63b	Homolog of Arabidopsis mechanosensor OSCA
Tmem63c	Homolog of Arabidopsis mechanosensor OSCA
*Previously reported to be expressed in PNECs
**Description of structure or function where known

## Sheet: S6b- Thermal
Table S6. Sensory genes (mouse)
Mouse gene symbol	Name (description)
Trpa1	Transient receptor potential cation channel-subfamily A, member 1 (temperature sensor)
Trpv1	Transient receptor potential cation channel-subfamily V, member 1 (heat sensor)
Trpv2	Transient receptor potential cation channel-subfamily V, member 2 (heat sensor)
Trpv3	Transient receptor potential cation channel-subfamily V, member 3 (temperature sensor)
Trpv4	Transient receptor potential cation channel-subfamily V, member 4 (heat sensor)
Trpm8	Transient receptor potential cation channel-subfamily M, member 9 (cold sensor)
Grik2	Glutamate receptor, ionotropic, kainate 2, GluK2

## Sheet: S6c - Mrgprs
Table S6a. Sensory genes (mouse)
Mouse gene symbol	Name (description)
Mrgpra1	Mas-related G-protein coupled receptor
Mrgpra2a	Mas-related G-protein coupled receptor
Mrgpra2b	Mas-related G-protein coupled receptor
Mrgpra3	Mas-related G-protein coupled receptor
Mrgpra4	Mas-related G-protein coupled receptor
Mrgpra5	Mas-related G-protein coupled receptor
Mrgpra6	Mas-related G-protein coupled receptor
Mrgpra7	Mas-related G-protein coupled receptor
Mrgpra8	Mas-related G-protein coupled receptor
Mrgpra9	Mas-related G-protein coupled receptor
Mrgprb1	Mas-related G-protein coupled receptor
Mrgprb2	Mas-related G-protein coupled receptor
Mrgprb3	Mas-related G-protein coupled receptor
Mrgprb4	Mas-related G-protein coupled receptor
Mrgprb5	Mas-related G-protein coupled receptor
Mrgprb8	Mas-related G-protein coupled receptor
Mrgprc11	Mas-related G-protein coupled receptor
Mrgprd	Mas-related G-protein coupled receptor
Mrgpre	Mas-related G-protein coupled receptor
Mrgprf	Mas-related G-protein coupled receptor
Mrgprg	Mas-related G-protein coupled receptor
Mrgprh	Mas-related G-protein coupled receptor
Mrgprx1	Mas-related G-protein coupled receptor (regulates inflammatory response)
Mrgprx2	Mas-related G-protein coupled receptor (regulates inflammatory response)

## Sheet: S6d - Acid
Table S6. Sensory genes (mouse)
Mouse gene symbol	Name (description)
Accn2	Acid-sensing ion channel 1 (proton-gated Na channel)
Accn1	Acid-sensing ion channel 2 (proton-gated Na channel)
Accn3	Acid-sensing ion channel 3 (proton-gated Na channel)
Accn4	Acid-sensing ion channel 4 (proton-gated Na channel)
Kcnk3	Potassium 2 pore domain channel subfamily K, member 3, TASK-1
Kcnk5	Potassium 2 pore domain channel subfamily K, member 5
Kcnk9	Potassium 2 pore domain channel subfamily K, member 9
Gpr4	G-protein coupled receptor 4
Gpr132	G-protein coupled receptor 132
Gpr65	G-protein coupled receptor 65
Gpr68	G-protein coupled receptor 68

## Sheet: S6e - Oxygen
Table S6. Sensory genes (mouse)
Mouse gene symbol	Name (description)
Hif1a	Hypoxia inducible factor 1, subunit alpha (hypoxia response regulator, transcription factor subunit)
Arnt	Aryl hydrocarbon receptor nuclear translocator (hypoxia response regulator, transcription factor subunit)
Epas1	Endothelial PAS domain, Hif2a (hypoxia response regulator, transcription factor subunit)
Hif3a	Hypoxia inducible factor 3, subunit alpha (hypoxia response regulator, transcription factor subunit)
Egln1	Hypoxia-inducible factor prolyl hydroxylase 2
Egln2	Egl-9 family hypoxia inducible factor 2
Egln3	Egl-9 family hypoxia inducible factor 3
Hif1an	Hypoxia-inducible factor 1-alpha inhibitor
Nox1	NADPH-oxidase 1 (membrane-bound enzyme complex, regulates reactive oxygen species)
Nox3	NADPH-oxidase 3 (membrane-bound enzyme complex, regulates reactive oxygen species)
Nox4*	NADPH-oxidase 4 (membrane-bound enzyme complex, regulates reactive oxygen species)
Cybb*	Cytochrome b245 beta chain, p91phox, NOX2 (catlytic subunit of NADPH oxidase)
Cyba*	Cytochrome b245 alpha chain, p22phox (subunit of NADPH oxidase)
Ncf1*	Neutrophil cytosolic factor 1- p47phox (subunit of NADPH oxidase)
Ncf2*	Neutrophil cytsolic factor 2 -p67-phox (subunit of NADPH oxidase)
Rac1	Rac family small GTPase (cytosolic subunit of NADPH oxidase)
Rac2	Rac family small GTPase (cytosolic subunit of NADPH oxidase)
Kcnk3*	Potassium 2 pore domain channel subfamily K, member 3, TASK-1 (acid-sensitive K channel)
Kcnk9	Potassium 2 pore domain channel, member 9, TASK-3 (acid-sensitive K channel)
Kcnc3*	Potassium voltage- gated channel subfamily C, member 3, Kv3.3 (voltage-gated K channel)
Kcnc4	Potassium voltage- gated channel subfamily C, member 4, Kv3.4 (voltage-gated K channel)
Kcnd3*	Potassium voltage- gated channel subfamily d, member 3, Kv4.3 (voltage-gated K channel)
Olfr78	Olfactory receptor 78 (lactate-activated GPCR in carotid body hypoxia pathway)
Olfr558	Olfactory receptor 558

## Sheet: S6f - CO2
Table S6. Sensory genes (mouse)
Mouse gene symbol	Name (description)
Car1	Carbonic anhydrase 1 (metalloenzyme, catalyzes interconversion of CO2 and H20)
Car2	Carbonic anhydrase 2 (metalloenzyme, catalyzes interconversion of CO2 and H20)
Car3	Carbonic anhydrase 3 (metalloenzyme, catalyzes interconversion of CO2 and H20)
Car4	Carbonic anhydrase 4 (metalloenzyme, catalyzes interconversion of CO2 and H20)
Car5a	Carbonic anhydrase 5a (metalloenzyme, catalyzes interconversion of CO2 and H20)
Car5b	Carbonic anhydrase 5b (metalloenzyme, catalyzes interconversion of CO2 and H20)
Car6	Carbonic anhydrase 6 (metalloenzyme, catalyzes interconversion of CO2 and H20)
Car7	Carbonic anhydrase 7 (metalloenzyme, catalyzes interconversion of CO2 and H20)
Car8	Carbonic anhydrase 8 (acatalytic)
Car9	Carbonic anhydrase 9 (metalloenzyme, catalyzes interconversion of CO2 and H20)
Car10	Carbonic anhydrase 10 (acatalytic)
Car11	Carbonic anhydrase 11 (acatalytic)
Car12	Carbonic anhydrase 12 (metalloenzyme, catalyzes interconversion of CO2 and H20)
Car13	Carbonic anhydrase 13 (metalloenzyme, catalyzes interconversion of CO2 and H20)
Car14	Carbonic anhydrase 14 (metalloenzyme, catalyzes interconversion of CO2 and H20)

## Sheet: S6g - TRP family
Table S6g. Sensory genes (mouse)
Mouse gene symbol	Name (description)
Trpc1	Transient receptor potential channel C1
Trpc2	Transient receptor potential channel C2
Trpc3	Transient receptor potential channel C3
Trpc4	Transient receptor potential channel C4
Trpc5	Transient receptor potential channel C5
Trpc6	Transient receptor potential channel C6
Trpc7	Transient receptor potential channel C7
Trpv1	Vanilloid receptor (heat sensor)
Trpv2	Vanilloid receptor
Trpv3	Vanilloid receptor
Trpv4	Vanilloid receptor
Trpv5	Vanilloid receptor
Trpv6	Vanilloid receptor
Trpm1	Transient receptor potential cation channel subfamily M, member 1 (transduces photoreceptive response in retinal bipolar cells)
Trpm2	Transient receptor potential cation channel subfamily M, member 2 (diverse sensory functions)
Trpm3	Transient receptor potential cation channel subfamily M, member 3 (diverse sensory functions)
Trpm4	Transient receptor potential cation channel subfamily M, member 4 (diverse sensory functions)
Trpm5	Transient receptor potential cation channel subfamily M, member 5 (diverse sensory functions)
Trpm6	Transient receptor potential cation channel subfamily M, member 6 (diverse sensory functions)
Trpm7	Transient receptor potential cation channel subfamily M, member 7 (diverse sensory functions)
Trpm8	Transient receptor potential cation channel subfamily M, member 8 (cold sensor)
Trpa1	Transient receptor potential cation channel subfamily A, member 1 (diverse sensory functions)
Pkd2	Polycystin 2
Pkd2l1	Polycystic kidney disease 2-like 1, transient receptor potential channel, TRPP3
Pkd2l2	Polycystic kidney disease 2-like 2, transient receptor potential channel, TRPP5
Pkd1	Poycystin, TRPP1
Mcoln1	Mucolipin 1, trasient receptor potential cation channel (vesicular trafficking, exocytosis)
Mcoln2	Mucolipin 2, trasient receptor potential cation channel (intracellular membrane transport)
Mcoln3	Mucolipin 3, trasient receptor potential cation channel (sensory transduction)

## Sheet: S6h - Olfactory
Table S6. Sensory genes (mouse)
Mouse gene symbol	Name (description)
Olfr1	Olfactory receptor 1
Olfr10	Olfactory receptor 10
Olfr100	Olfactory receptor 100
Olfr1000	Olfactory receptor 1000
Olfr1002	Olfactory receptor 1002
Olfr1006	Olfactory receptor 1006
Olfr1008	Olfactory receptor 1008
Olfr1009	Olfactory receptor 1009
Olfr101	Olfactory receptor 101
Olfr1010	Olfactory receptor 1010
Olfr1012	Olfactory receptor 1012
Olfr1013	Olfactory receptor 1013
Olfr1014	Olfactory receptor 1014
Olfr1015	Olfactory receptor 1015
Olfr1016	Olfactory receptor 1016
Olfr1018	Olfactory receptor 1018
Olfr1019	Olfactory receptor 1019
Olfr102	Olfactory receptor 102
Olfr1020	Olfactory receptor 1020
Olfr1022	Olfactory receptor 1022
Olfr1023	Olfactory receptor 1023
Olfr1024	Olfactory receptor 1024
Olfr1026	Olfactory receptor 1026
Olfr1028	Olfactory receptor 1028
Olfr1029	Olfactory receptor 1029
Olfr103	Olfactory receptor 103
Olfr1030	Olfactory receptor 1030
Olfr1031	Olfactory receptor 1031
Olfr1032	Olfactory receptor 1032
Olfr1033	Olfactory receptor 1033
Olfr1034	Olfactory receptor 1034
Olfr1036	Olfactory receptor 1036
Olfr1037	Olfactory receptor 1037
Olfr1039	Olfactory receptor 1039
Olfr1040	Olfactory receptor 1040
Olfr1042	Olfactory receptor 1042
Olfr1043	Olfactory receptor 1043
Olfr1044	Olfactory receptor 1044
Olfr1045	Olfactory receptor 1045
Olfr1046	Olfactory receptor 1046
Olfr1047	Olfactory receptor 1047
Olfr1048	Olfactory receptor 1048
Olfr1049	Olfactory receptor 1049
Olfr1051	Olfactory receptor 1051
Olfr1052	Olfactory receptor 1052
Olfr1053	Olfactory receptor 1053
Olfr1054	Olfactory receptor 1054
Olfr1055	Olfactory receptor 1055
Olfr1056	Olfactory receptor 1056
Olfr1057	Olfactory receptor 1057
Olfr1058	Olfactory receptor 1058
Olfr1061	Olfactory receptor 1061
Olfr1062	Olfactory receptor 1062
Olfr1065	Olfactory receptor 1065
Olfr1066	Olfactory receptor 1066
Olfr107	Olfactory receptor 107
Olfr1076	Olfactory receptor 1076
Olfr1079	Olfactory receptor 1079
Olfr108	Olfactory receptor 108
Olfr1080	Olfactory receptor 1080
Olfr1082	Olfactory receptor 1082
Olfr1084	Olfactory receptor 1084
Olfr1085	Olfactory receptor 1085
Olfr1086	Olfactory receptor 1086
Olfr1087	Olfactory receptor 1087
Olfr1089	Olfactory receptor 1089
Olfr109	Olfactory receptor 109
Olfr1090	Olfactory receptor 1090
Olfr1093	Olfactory receptor 1093
Olfr1094	Olfactory receptor 1094
Olfr1095	Olfactory receptor 1095
Olfr1097	Olfactory receptor 1097
Olfr1098	Olfactory receptor 1098
Olfr1099	Olfactory receptor 1099
Olfr11	Olfactory receptor 11
Olfr110	Olfactory receptor 110
Olfr1100	Olfactory receptor 1100
Olfr1101	Olfactory receptor 1101
Olfr1102	Olfactory receptor 1102
Olfr1104	Olfactory receptor 1104
Olfr1105	Olfactory receptor 1105
Olfr1106	Olfactory receptor 1106
Olfr1107	Olfactory receptor 1107
Olfr1109	Olfactory receptor 1109
Olfr111	Olfactory receptor 111
Olfr1110	Olfactory receptor 1110
Olfr1111	Olfactory receptor 1111
Olfr1112	Olfactory receptor 1112
Olfr1113	Olfactory receptor 1113
Olfr1115	Olfactory receptor 1115
Olfr1118	Olfactory receptor 1118
Olfr112	Olfactory receptor 112
Olfr1120	Olfactory receptor 1120
Olfr1121	Olfactory receptor 1121
Olfr1122	Olfactory receptor 1122
Olfr1123	Olfactory receptor 1123
Olfr1124	Olfactory receptor 1124
Olfr1126	Olfactory receptor 1126
Olfr1128	Olfactory receptor 1128
Olfr1129	Olfactory receptor 1129
Olfr113	Olfactory receptor 113
Olfr1130	Olfactory receptor 1130
Olfr1131	Olfactory receptor 1131
Olfr1132	Olfactory receptor 1132
Olfr1133	Olfactory receptor 1133
Olfr1134	Olfactory receptor 1134
Olfr1135	Olfactory receptor 1135
Olfr1136	Olfactory receptor 1136
Olfr1137	Olfactory receptor 1137
Olfr1138	Olfactory receptor 1138
Olfr114	Olfactory receptor 114
Olfr1140	Olfactory receptor 1140
Olfr1141	Olfactory receptor 1141
Olfr1143	Olfactory receptor 1143
Olfr1145	Olfactory receptor 1145
Olfr1148	Olfactory receptor 1148
Olfr115	Olfactory receptor 115
Olfr1151	Olfactory receptor 1151
Olfr1152	Olfactory receptor 1152
Olfr1153	Olfactory receptor 1153
Olfr1154	Olfactory receptor 1154
Olfr1155	Olfactory receptor 1155
Olfr1156	Olfactory receptor 1156
Olfr1157	Olfactory receptor 1157
Olfr1158	Olfactory receptor 1158
Olfr116	Olfactory receptor 116
Olfr1160	Olfactory receptor 1160
Olfr1161	Olfactory receptor 1161
Olfr1162	Olfactory receptor 1162
Olfr1163	Olfactory receptor 1163
Olfr1164	Olfactory receptor 1164
Olfr1166	Olfactory receptor 1166
Olfr1167	Olfactory receptor 1167
Olfr1168	Olfactory receptor 1168
Olfr117	Olfactory receptor 117
Olfr1170	Olfactory receptor 1170
Olfr1173	Olfactory receptor 1173
Olfr1176	Olfactory receptor 1176
Olfr1178	Olfactory receptor 1178
Olfr1179	Olfactory receptor 1179
Olfr118	Olfactory receptor 118
Olfr1180	Olfactory receptor 1180
Olfr1181	Olfactory receptor 1181
Olfr1182	Olfactory receptor 1182
Olfr1183	Olfactory receptor 1183
Olfr1184	Olfactory receptor 1184
Olfr1186	Olfactory receptor 1186
Olfr1188	Olfactory receptor 1188
Olfr1189	Olfactory receptor 1189
Olfr119	Olfactory receptor 119
Olfr1193	Olfactory receptor 1193
Olfr1195	Olfactory receptor 1195
Olfr1196	Olfactory receptor 1196
Olfr1197	Olfactory receptor 1197
Olfr1198	Olfactory receptor 1198
Olfr1199	Olfactory receptor 1199
Olfr12	Olfactory receptor 12
Olfr120	Olfactory receptor 120
Olfr1200	Olfactory receptor 1200
Olfr1201	Olfactory receptor 1201
Olfr1202	Olfactory receptor 1202
Olfr1204	Olfactory receptor 1204
Olfr1205	Olfactory receptor 1205
Olfr1206	Olfactory receptor 1206
Olfr1208	Olfactory receptor 1208
Olfr1209	Olfactory receptor 1209
Olfr121	Olfactory receptor 121
Olfr1211	Olfactory receptor 1211
Olfr1212	Olfactory receptor 1212
Olfr1213	Olfactory receptor 1213
Olfr1214	Olfactory receptor 1214
Olfr1215	Olfactory receptor 1215
Olfr1216	Olfactory receptor 1216
Olfr1217	Olfactory receptor 1217
Olfr1218	Olfactory receptor 1218
Olfr1219	Olfactory receptor 1219
Olfr122	Olfactory receptor 122
Olfr1220	Olfactory receptor 1220
Olfr1221	Olfactory receptor 1221
Olfr1222	Olfactory receptor 1222
Olfr1223	Olfactory receptor 1223
Olfr1225	Olfactory receptor 1225
Olfr1226	Olfactory receptor 1226
Olfr1228	Olfactory receptor 1228
Olfr1229	Olfactory receptor 1229
Olfr123	Olfactory receptor 123
Olfr1230	Olfactory receptor 1230
Olfr1231	Olfactory receptor 1231
Olfr1232	Olfactory receptor 1232
Olfr1233	Olfactory receptor 1233
Olfr1234	Olfactory receptor 1234
Olfr1238	Olfactory receptor 1238
Olfr1239	Olfactory receptor 1239
Olfr124	Olfactory receptor 124
Olfr1240	Olfactory receptor 1240
Olfr1241	Olfactory receptor 1241
Olfr1242	Olfactory receptor 1242
Olfr1243	Olfactory receptor 1243
Olfr1245	Olfactory receptor 1245
Olfr1246	Olfactory receptor 1246
Olfr1247	Olfactory receptor 1247
Olfr1248	Olfactory receptor 1248
Olfr1249	Olfactory receptor 1249
Olfr125	Olfactory receptor 125
Olfr1250	Olfactory receptor 1250
Olfr1251	Olfactory receptor 1251
Olfr1252	Olfactory receptor 1252
Olfr1253	Olfactory receptor 1253
Olfr1254	Olfactory receptor 1254
Olfr1255	Olfactory receptor 1255
Olfr1256	Olfactory receptor 1256
Olfr1257	Olfactory receptor 1257
Olfr1258	Olfactory receptor 1258
Olfr1259	Olfactory receptor 1259
Olfr126	Olfactory receptor 126
Olfr1260	Olfactory receptor 1260
Olfr1261	Olfactory receptor 1261
Olfr1262	Olfactory receptor 1262
Olfr1263	Olfactory receptor 1263
Olfr1264	Olfactory receptor 1264
Olfr1265	Olfactory receptor 1265
Olfr1269	Olfactory receptor 1269
Olfr127	Olfactory receptor 127
Olfr1270	Olfactory receptor 1270
Olfr1271	Olfactory receptor 1271
Olfr1272	Olfactory receptor 1272
Olfr1275	Olfactory receptor 1275
Olfr1276	Olfactory receptor 1276
Olfr1277	Olfactory receptor 1277
Olfr1278	Olfactory receptor 1278
Olfr1279	Olfactory receptor 1279
Olfr128	Olfactory receptor 128
Olfr1280	Olfactory receptor 1280
Olfr1281	Olfactory receptor 1281
Olfr1282	Olfactory receptor 1282
Olfr1283	Olfactory receptor 1283
Olfr1284	Olfactory receptor 1284
Olfr1286	Olfactory receptor 1286
Olfr1287	Olfactory receptor 1287
Olfr1288	Olfactory receptor 1288
Olfr1289	Olfactory receptor 1289
Olfr129	Olfactory receptor 129
Olfr1290	Olfactory receptor 1290
Olfr1294	Olfactory receptor 1294
Olfr1295	Olfactory receptor 1295
Olfr1297	Olfactory receptor 1297
Olfr1298	Olfactory receptor 1298
Olfr1299	Olfactory receptor 1299
Olfr13	Olfactory receptor 13
Olfr130	Olfactory receptor 130
Olfr1301	Olfactory receptor 1301
Olfr1302	Olfactory receptor 1302
Olfr1303	Olfactory receptor 1303
Olfr1305	Olfactory receptor 1305
Olfr1306	Olfactory receptor 1306
Olfr1307	Olfactory receptor 1307
Olfr1308	Olfactory receptor 1308
Olfr1309	Olfactory receptor 1309
Olfr131	Olfactory receptor 131
Olfr1310	Olfactory receptor 1310
Olfr1311	Olfactory receptor 1311
Olfr1312	Olfactory receptor 1312
Olfr1313	Olfactory receptor 1313
Olfr1314	Olfactory receptor 1314
Olfr1316	Olfactory receptor 1316
Olfr1317	Olfactory receptor 1317
Olfr1318	Olfactory receptor 1318
Olfr132	Olfactory receptor 132
Olfr1320	Olfactory receptor 1320
Olfr1321	Olfactory receptor 1321
Olfr1322	Olfactory receptor 1322
Olfr1323	Olfactory receptor 1323
Olfr1324	Olfactory receptor 1324
Olfr1325	Olfactory receptor 1325
Olfr1328	Olfactory receptor 1328
Olfr1329	Olfactory receptor 1329
Olfr133	Olfactory receptor 133
Olfr1330	Olfactory receptor 1330
Olfr1331	Olfactory receptor 1331
Olfr1333	Olfactory receptor 1333
Olfr1335	Olfactory receptor 1335
Olfr1336	Olfactory receptor 1336
Olfr1337	Olfactory receptor 1337
Olfr1338	Olfactory receptor 1338
Olfr1339	Olfactory receptor 1339
Olfr134	Olfactory receptor 134
Olfr1340	Olfactory receptor 1340
Olfr1341	Olfactory receptor 1341
Olfr1342	Olfactory receptor 1342
Olfr1344	Olfactory receptor 1344
Olfr1346	Olfactory receptor 1346
Olfr1347	Olfactory receptor 1347
Olfr1348	Olfactory receptor 1348
Olfr1349	Olfactory receptor 1349
Olfr135	Olfactory receptor 135
Olfr1350	Olfactory receptor 1350
Olfr1351	Olfactory receptor 1351
Olfr1352	Olfactory receptor 1352
Olfr1353	Olfactory receptor 1353
Olfr1354	Olfactory receptor 1354
Olfr1355	Olfactory receptor 1355
Olfr1356	Olfactory receptor 1356
Olfr1357	Olfactory receptor 1357
Olfr1359	Olfactory receptor 1359
Olfr136	Olfactory receptor 136
Olfr1360	Olfactory receptor 1360
Olfr1361	Olfactory receptor 1361
Olfr1362	Olfactory receptor 1362
Olfr1364	Olfactory receptor 1364
Olfr1366	Olfactory receptor 1366
Olfr1367	Olfactory receptor 1367
Olfr1368	Olfactory receptor 1368
Olfr137	Olfactory receptor 137
Olfr1370	Olfactory receptor 1370
Olfr1371	Olfactory receptor 1371
Olfr1373	Olfactory receptor 1373
Olfr1377	Olfactory receptor 1377
Olfr1378	Olfactory receptor 1378
Olfr138	Olfactory receptor 138
Olfr1380	Olfactory receptor 1380
Olfr1381	Olfactory receptor 1381
Olfr1382	Olfactory receptor 1382
Olfr1383	Olfactory receptor 1383
Olfr1384	Olfactory receptor 1384
Olfr1385	Olfactory receptor 1385
Olfr1386	Olfactory receptor 1386
Olfr1387	Olfactory receptor 1387
Olfr1388	Olfactory receptor 1388
Olfr1389	Olfactory receptor 1389
Olfr139	Olfactory receptor 139
Olfr1390	Olfactory receptor 1390
Olfr1391	Olfactory receptor 1391
Olfr1392	Olfactory receptor 1392
Olfr1393	Olfactory receptor 1393
Olfr1394	Olfactory receptor 1394
Olfr1395	Olfactory receptor 1395
Olfr1396	Olfactory receptor 1396
Olfr140	Olfactory receptor 140
Olfr1402	Olfactory receptor 1402
Olfr1404	Olfactory receptor 1404
Olfr1406	Olfactory receptor 1406
Olfr1408	Olfactory receptor 1408
Olfr141	Olfactory receptor 141
Olfr1410	Olfactory receptor 1410
Olfr1411	Olfactory receptor 1411
Olfr1412	Olfactory receptor 1412
Olfr1413	Olfactory receptor 1413
Olfr1414	Olfactory receptor 1414
Olfr1415	Olfactory receptor 1415
Olfr1416	Olfactory receptor 1416
Olfr1417	Olfactory receptor 1417
Olfr1418	Olfactory receptor 1418
Olfr1419	Olfactory receptor 1419
Olfr142	Olfactory receptor 142
Olfr1420	Olfactory receptor 1420
Olfr1423	Olfactory receptor 1423
Olfr1424	Olfactory receptor 1424
Olfr1425	Olfactory receptor 1425
Olfr1426	Olfactory receptor 1426
Olfr1427	Olfactory receptor 1427
Olfr1428	Olfactory receptor 1428
Olfr143	Olfactory receptor 143
Olfr1431	Olfactory receptor 1431
Olfr1433	Olfactory receptor 1433
Olfr1434	Olfactory receptor 1434
Olfr1436	Olfactory receptor 1436
Olfr1437	Olfactory receptor 1437
Olfr1440	Olfactory receptor 1440
Olfr1441	Olfactory receptor 1441
Olfr1442	Olfactory receptor 1442
Olfr1443	Olfactory receptor 1443
Olfr1444	Olfactory receptor 1444
Olfr1445	Olfactory receptor 1445
Olfr1446	Olfactory receptor 1446
Olfr1447	Olfactory receptor 1447
Olfr1448	Olfactory receptor 1448
Olfr1449	Olfactory receptor 1449
Olfr145	Olfactory receptor 145
Olfr1450	Olfactory receptor 1450
Olfr1451	Olfactory receptor 1451
Olfr1453	Olfactory receptor 1453
Olfr1454	Olfactory receptor 1454
Olfr1457	Olfactory receptor 1457
Olfr1459	Olfactory receptor 1459
Olfr146	Olfactory receptor 146
Olfr1461	Olfactory receptor 1461
Olfr1462	Olfactory receptor 1462
Olfr1463	Olfactory receptor 1463
Olfr1465	Olfactory receptor 1465
Olfr1466	Olfactory receptor 1466
Olfr1467	Olfactory receptor 1467
Olfr1469	Olfactory receptor 1469
Olfr147	Olfactory receptor 147
Olfr1471	Olfactory receptor 1471
Olfr1472	Olfactory receptor 1472
Olfr1474	Olfactory receptor 1474
Olfr1475	Olfactory receptor 1475
Olfr1477	Olfactory receptor 1477
Olfr148	Olfactory receptor 148
Olfr1480	Olfactory receptor 1480
Olfr1484	Olfactory receptor 1484
Olfr1487	Olfactory receptor 1487
Olfr1489	Olfactory receptor 1489
Olfr149	Olfactory receptor 149
Olfr1490	Olfactory receptor 1490
Olfr1491	Olfactory receptor 1491
Olfr1494	Olfactory receptor 1494
Olfr1495	Olfactory receptor 1495
Olfr1496	Olfactory receptor 1496
Olfr1497	Olfactory receptor 1497
Olfr1499	Olfactory receptor 1499
Olfr15	Olfactory receptor 15
Olfr150	Olfactory receptor 150
Olfr1500	Olfactory receptor 1500
Olfr1501	Olfactory receptor 1501
Olfr1502	Olfactory receptor 1502
Olfr1504	Olfactory receptor 1504
Olfr1505	Olfactory receptor 1505
Olfr1506	Olfactory receptor 1506
Olfr1507	Olfactory receptor 1507
Olfr1508	Olfactory receptor 1508
Olfr1509	Olfactory receptor 1509
Olfr151	Olfactory receptor 151
Olfr1510	Olfactory receptor 1510
Olfr1511	Olfactory receptor 1511
Olfr1512	Olfactory receptor 1512
Olfr1513	Olfactory receptor 1513
Olfr152	Olfactory receptor 152
Olfr153	Olfactory receptor 153
Olfr1535	Olfactory receptor 1535
Olfr154	Olfactory receptor 154
Olfr155	Olfactory receptor 155
Olfr156	Olfactory receptor 156
Olfr157	Olfactory receptor 157
Olfr159	Olfactory receptor 159
Olfr16	Olfactory receptor 16
Olfr160	Olfactory receptor 160
Olfr161	Olfactory receptor 161
Olfr164	Olfactory receptor 164
Olfr165	Olfactory receptor 165
Olfr166	Olfactory receptor 166
Olfr167	Olfactory receptor 167
Olfr168	Olfactory receptor 168
Olfr169	Olfactory receptor 169
Olfr17	Olfactory receptor 17
Olfr170	Olfactory receptor 170
Olfr171	Olfactory receptor 171
Olfr172	Olfactory receptor 172
Olfr173	Olfactory receptor 173
Olfr176	Olfactory receptor 176
Olfr177	Olfactory receptor 177
Olfr178	Olfactory receptor 178
Olfr179	Olfactory receptor 179
Olfr18	Olfactory receptor 18
Olfr180	Olfactory receptor 180
Olfr181	Olfactory receptor 181
Olfr183	Olfactory receptor 183
Olfr186	Olfactory receptor 186
Olfr187	Olfactory receptor 187
Olfr19	Olfactory receptor 19
Olfr190	Olfactory receptor 190
Olfr191	Olfactory receptor 191
Olfr192	Olfactory receptor 192
Olfr193	Olfactory receptor 193
Olfr194	Olfactory receptor 194
Olfr195	Olfactory receptor 195
Olfr196	Olfactory receptor 196
Olfr197	Olfactory receptor 197
Olfr198	Olfactory receptor 198
Olfr199	Olfactory receptor 199
Olfr2	Olfactory receptor 2
Olfr20	Olfactory receptor 20
Olfr201	Olfactory receptor 201
Olfr202	Olfactory receptor 202
Olfr203	Olfactory receptor 203
Olfr204	Olfactory receptor 204
Olfr205	Olfactory receptor 205
Olfr206	Olfactory receptor 206
Olfr207	Olfactory receptor 207
Olfr208	Olfactory receptor 208
Olfr209	Olfactory receptor 209
Olfr211	Olfactory receptor 211
Olfr212	Olfactory receptor 212
Olfr213	Olfactory receptor 213
Olfr214	Olfactory receptor 214
Olfr215	Olfactory receptor 215
Olfr218	Olfactory receptor 218
Olfr220	Olfactory receptor 220
Olfr221	Olfactory receptor 221
Olfr222	Olfactory receptor 222
Olfr223	Olfactory receptor 223
Olfr224	Olfactory receptor 224
Olfr225	Olfactory receptor 225
Olfr228	Olfactory receptor 228
Olfr229	Olfactory receptor 229
Olfr23	Olfactory receptor 23
Olfr231	Olfactory receptor 231
Olfr235	Olfactory receptor 235
Olfr239	Olfactory receptor 239
Olfr24	Olfactory receptor 24
Olfr242	Olfactory receptor 242
Olfr243	Olfactory receptor 243
Olfr247	Olfactory receptor 247
Olfr248	Olfactory receptor 248
Olfr25	Olfactory receptor 25
Olfr250	Olfactory receptor 250
Olfr251	Olfactory receptor 251
Olfr257	Olfactory receptor 257
Olfr259	Olfactory receptor 259
Olfr26	Olfactory receptor 26
Olfr262	Olfactory receptor 262
Olfr263	Olfactory receptor 263
Olfr266	Olfactory receptor 266
Olfr267	Olfactory receptor 267
Olfr27	Olfactory receptor 27
Olfr270	Olfactory receptor 270
Olfr272	Olfactory receptor 272
Olfr273	Olfactory receptor 273
Olfr275	Olfactory receptor 275
Olfr279	Olfactory receptor 279
Olfr281	Olfactory receptor 281
Olfr282	Olfactory receptor 282
Olfr283	Olfactory receptor 283
Olfr284	Olfactory receptor 284
Olfr285	Olfactory receptor 285
Olfr286	Olfactory receptor 286
Olfr287	Olfactory receptor 287
Olfr288	Olfactory receptor 288
Olfr290	Olfactory receptor 290
Olfr291	Olfactory receptor 291
Olfr292	Olfactory receptor 292
Olfr293	Olfactory receptor 293
Olfr294	Olfactory receptor 294
Olfr295	Olfactory receptor 295
Olfr297	Olfactory receptor 297
Olfr298	Olfactory receptor 298
Olfr299	Olfactory receptor 299
Olfr3	Olfactory receptor 3
Olfr30	Olfactory receptor 30
Olfr301	Olfactory receptor 301
Olfr303	Olfactory receptor 303
Olfr304	Olfactory receptor 304
Olfr305	Olfactory receptor 305
Olfr307	Olfactory receptor 307
Olfr308	Olfactory receptor 308
Olfr309	Olfactory receptor 309
Olfr31	Olfactory receptor 31
Olfr310	Olfactory receptor 310
Olfr311	Olfactory receptor 311
Olfr312	Olfactory receptor 312
Olfr313	Olfactory receptor 313
Olfr314	Olfactory receptor 314
Olfr315	Olfactory receptor 315
Olfr316	Olfactory receptor 316
Olfr317	Olfactory receptor 317
Olfr318	Olfactory receptor 318
Olfr319	Olfactory receptor 319
Olfr32	Olfactory receptor 32
Olfr320	Olfactory receptor 320
Olfr323	Olfactory receptor 323
Olfr324	Olfactory receptor 324
Olfr325	Olfactory receptor 325
Olfr328	Olfactory receptor 328
Olfr33	Olfactory receptor 33
Olfr330	Olfactory receptor 330
Olfr331	Olfactory receptor 331
Olfr332	Olfactory receptor 332
Olfr338	Olfactory receptor 338
Olfr339	Olfactory receptor 339
Olfr340	Olfactory receptor 340
Olfr341	Olfactory receptor 341
Olfr342	Olfactory receptor 342
Olfr344	Olfactory receptor 344
Olfr345	Olfactory receptor 345
Olfr346	Olfactory receptor 346
Olfr347	Olfactory receptor 347
Olfr348	Olfactory receptor 348
Olfr350	Olfactory receptor 350
Olfr351	Olfactory receptor 351
Olfr352	Olfactory receptor 352
Olfr353	Olfactory receptor 353
Olfr354	Olfactory receptor 354
Olfr355	Olfactory receptor 355
Olfr356	Olfactory receptor 356
Olfr357	Olfactory receptor 357
Olfr358	Olfactory receptor 358
Olfr360	Olfactory receptor 360
Olfr361	Olfactory receptor 361
Olfr362	Olfactory receptor 362
Olfr365	Olfactory receptor 365
Olfr366	Olfactory receptor 366
Olfr368	Olfactory receptor 368
Olfr370	Olfactory receptor 370
Olfr371	Olfactory receptor 371
Olfr372	Olfactory receptor 372
Olfr373	Olfactory receptor 373
Olfr374	Olfactory receptor 374
Olfr376	Olfactory receptor 376
Olfr378	Olfactory receptor 378
Olfr38	Olfactory receptor 38
Olfr380	Olfactory receptor 380
Olfr381	Olfactory receptor 381
Olfr382	Olfactory receptor 382
Olfr384	Olfactory receptor 384
Olfr385	Olfactory receptor 385
Olfr389	Olfactory receptor 389
Olfr39	Olfactory receptor 39
Olfr390	Olfactory receptor 390
Olfr392	Olfactory receptor 392
Olfr393	Olfactory receptor 393
Olfr394	Olfactory receptor 394
Olfr395	Olfactory receptor 395
Olfr397	Olfactory receptor 397
Olfr398	Olfactory receptor 398
Olfr399	Olfactory receptor 399
Olfr401	Olfactory receptor 401
Olfr402	Olfactory receptor 402
Olfr403	Olfactory receptor 403
Olfr410	Olfactory receptor 410
Olfr411	Olfactory receptor 411
Olfr412	Olfactory receptor 412
Olfr414	Olfactory receptor 414
Olfr417	Olfactory receptor 417
Olfr419	Olfactory receptor 419
Olfr420	Olfactory receptor 420
Olfr424	Olfactory receptor 424
Olfr426	Olfactory receptor 426
Olfr427	Olfactory receptor 427
Olfr429	Olfactory receptor 429
Olfr43	Olfactory receptor 43
Olfr430	Olfactory receptor 430
Olfr432	Olfactory receptor 432
Olfr433	Olfactory receptor 433
Olfr434	Olfactory receptor 434
Olfr435	Olfactory receptor 435
Olfr437	Olfactory receptor 437
Olfr44	Olfactory receptor 44
Olfr441	Olfactory receptor 441
Olfr444	Olfactory receptor 444
Olfr446	Olfactory receptor 446
Olfr447	Olfactory receptor 447
Olfr448	Olfactory receptor 448
Olfr449	Olfactory receptor 449
Olfr45	Olfactory receptor 45
Olfr450	Olfactory receptor 450
Olfr452	Olfactory receptor 452
Olfr453	Olfactory receptor 453
Olfr455	Olfactory receptor 455
Olfr456	Olfactory receptor 456
Olfr457	Olfactory receptor 457
Olfr458	Olfactory receptor 458
Olfr459	Olfactory receptor 459
Olfr46	Olfactory receptor 46
Olfr460	Olfactory receptor 460
Olfr461	Olfactory receptor 461
Olfr462	Olfactory receptor 462
Olfr463	Olfactory receptor 463
Olfr464	Olfactory receptor 464
Olfr466	Olfactory receptor 466
Olfr467	Olfactory receptor 467
Olfr469	Olfactory receptor 469
Olfr47	Olfactory receptor 47
Olfr470	Olfactory receptor 470
Olfr472	Olfactory receptor 472
Olfr473	Olfactory receptor 473
Olfr474	Olfactory receptor 474
Olfr476	Olfactory receptor 476
Olfr477	Olfactory receptor 477
Olfr478	Olfactory receptor 478
Olfr479	Olfactory receptor 479
Olfr48	Olfactory receptor 48
Olfr480	Olfactory receptor 480
Olfr481	Olfactory receptor 481
Olfr482	Olfactory receptor 482
Olfr483	Olfactory receptor 483
Olfr484	Olfactory receptor 484
Olfr485	Olfactory receptor 485
Olfr486	Olfactory receptor 486
Olfr487	Olfactory receptor 487
Olfr488	Olfactory receptor 488
Olfr49	Olfactory receptor 49
Olfr490	Olfactory receptor 490
Olfr491	Olfactory receptor 491
Olfr492	Olfactory receptor 492
Olfr493	Olfactory receptor 493
Olfr494	Olfactory receptor 494
Olfr495	Olfactory receptor 495
Olfr497	Olfactory receptor 497
Olfr498	Olfactory receptor 498
Olfr5	Olfactory receptor 5
Olfr50	Olfactory receptor 50
Olfr502	Olfactory receptor 502
Olfr503	Olfactory receptor 503
Olfr504	Olfactory receptor 504
Olfr506	Olfactory receptor 506
Olfr507	Olfactory receptor 507
Olfr508	Olfactory receptor 508
Olfr509	Olfactory receptor 509
Olfr51	Olfactory receptor 51
Olfr510	Olfactory receptor 510
Olfr512	Olfactory receptor 512
Olfr513	Olfactory receptor 513
Olfr514	Olfactory receptor 514
Olfr516	Olfactory receptor 516
Olfr517	Olfactory receptor 517
Olfr518	Olfactory receptor 518
Olfr519	Olfactory receptor 519
Olfr52	Olfactory receptor 52
Olfr520	Olfactory receptor 520
Olfr521	Olfactory receptor 521
Olfr522	Olfactory receptor 522
Olfr523	Olfactory receptor 523
Olfr524	Olfactory receptor 524
Olfr525	Olfactory receptor 525
Olfr527	Olfactory receptor 527
Olfr53	Olfactory receptor 53
Olfr530	Olfactory receptor 530
Olfr531	Olfactory receptor 531
Olfr532	Olfactory receptor 532
Olfr533	Olfactory receptor 533
Olfr535	Olfactory receptor 535
Olfr536	Olfactory receptor 536
Olfr538	Olfactory receptor 538
Olfr539	Olfactory receptor 539
Olfr54	Olfactory receptor 54
Olfr541	Olfactory receptor 541
Olfr543	Olfactory receptor 543
Olfr544	Olfactory receptor 544
Olfr545	Olfactory receptor 545
Olfr547	Olfactory receptor 547
Olfr549	Olfactory receptor 549
Olfr55	Olfactory receptor 55
Olfr550	Olfactory receptor 550
Olfr551	Olfactory receptor 551
Olfr552	Olfactory receptor 552
Olfr553	Olfactory receptor 553
Olfr554	Olfactory receptor 554
Olfr555	Olfactory receptor 555
Olfr556	Olfactory receptor 556
Olfr557	Olfactory receptor 557
Olfr558	Olfactory receptor 558
Olfr559	Olfactory receptor 559
Olfr56	Olfactory receptor 56
Olfr560	Olfactory receptor 560
Olfr561	Olfactory receptor 561
Olfr564	Olfactory receptor 564
Olfr566	Olfactory receptor 566
Olfr568	Olfactory receptor 568
Olfr569	Olfactory receptor 569
Olfr57	Olfactory receptor 57
Olfr570	Olfactory receptor 570
Olfr571	Olfactory receptor 571
Olfr572	Olfactory receptor 572
Olfr574	Olfactory receptor 574
Olfr575	Olfactory receptor 575
Olfr576	Olfactory receptor 576
Olfr577	Olfactory receptor 577
Olfr578	Olfactory receptor 578
Olfr58	Olfactory receptor 58
Olfr582	Olfactory receptor 582
Olfr583	Olfactory receptor 583
Olfr584	Olfactory receptor 584
Olfr585	Olfactory receptor 585
Olfr586	Olfactory receptor 586
Olfr589	Olfactory receptor 589
Olfr59	Olfactory receptor 59
Olfr591	Olfactory receptor 591
Olfr592	Olfactory receptor 592
Olfr593	Olfactory receptor 593
Olfr594	Olfactory receptor 594
Olfr596	Olfactory receptor 596
Olfr597	Olfactory receptor 597
Olfr598	Olfactory receptor 598
Olfr599	Olfactory receptor 599
Olfr6	Olfactory receptor 6
Olfr60	Olfactory receptor 60
Olfr600	Olfactory receptor 600
Olfr601	Olfactory receptor 601
Olfr603	Olfactory receptor 603
Olfr605	Olfactory receptor 605
Olfr606	Olfactory receptor 606
Olfr608	Olfactory receptor 608
Olfr609	Olfactory receptor 609
Olfr61	Olfactory receptor 61
Olfr610	Olfactory receptor 610
Olfr611	Olfactory receptor 611
Olfr612	Olfactory receptor 612
Olfr613	Olfactory receptor 613
Olfr615	Olfactory receptor 615
Olfr616	Olfactory receptor 616
Olfr617	Olfactory receptor 617
Olfr618	Olfactory receptor 618
Olfr619	Olfactory receptor 619
Olfr62	Olfactory receptor 62
Olfr620	Olfactory receptor 620
Olfr622	Olfactory receptor 622
Olfr623	Olfactory receptor 623
Olfr624	Olfactory receptor 624
Olfr628	Olfactory receptor 628
Olfr629	Olfactory receptor 629
Olfr63	Olfactory receptor 63
Olfr630	Olfactory receptor 630
Olfr631	Olfactory receptor 631
Olfr632	Olfactory receptor 632
Olfr633	Olfactory receptor 633
Olfr635	Olfactory receptor 635
Olfr638	Olfactory receptor 638
Olfr639	Olfactory receptor 639
Olfr64	Olfactory receptor 64
Olfr640	Olfactory receptor 640
Olfr641	Olfactory receptor 641
Olfr642	Olfactory receptor 642
Olfr643	Olfactory receptor 643
Olfr644	Olfactory receptor 644
Olfr645	Olfactory receptor 645
Olfr646	Olfactory receptor 646
Olfr648	Olfactory receptor 648
Olfr649	Olfactory receptor 649
Olfr65	Olfactory receptor 65
Olfr651	Olfactory receptor 651
Olfr652	Olfactory receptor 652
Olfr653	Olfactory receptor 653
Olfr654	Olfactory receptor 654
Olfr655	Olfactory receptor 655
Olfr656	Olfactory receptor 656
Olfr657	Olfactory receptor 657
Olfr658	Olfactory receptor 658
Olfr659	Olfactory receptor 659
Olfr66	Olfactory receptor 66
Olfr661	Olfactory receptor 661
Olfr663	Olfactory receptor 663
Olfr665	Olfactory receptor 665
Olfr666	Olfactory receptor 666
Olfr667	Olfactory receptor 667
Olfr668	Olfactory receptor 668
Olfr669	Olfactory receptor 669
Olfr67	Olfactory receptor 67
Olfr670	Olfactory receptor 670
Olfr671	Olfactory receptor 671
Olfr672	Olfactory receptor 672
Olfr675	Olfactory receptor 675
Olfr676	Olfactory receptor 676
Olfr677	Olfactory receptor 677
Olfr678	Olfactory receptor 678
Olfr679	Olfactory receptor 679
Olfr68	Olfactory receptor 68
Olfr681	Olfactory receptor 681
Olfr683	Olfactory receptor 683
Olfr684	Olfactory receptor 684
Olfr685	Olfactory receptor 685
Olfr686	Olfactory receptor 686
Olfr688	Olfactory receptor 688
Olfr689	Olfactory receptor 689
Olfr69	Olfactory receptor 69
Olfr690	Olfactory receptor 690
Olfr691	Olfactory receptor 691
Olfr692	Olfactory receptor 692
Olfr693	Olfactory receptor 693
Olfr694	Olfactory receptor 694
Olfr695	Olfactory receptor 695
Olfr697	Olfactory receptor 697
Olfr698	Olfactory receptor 698
Olfr699	Olfactory receptor 699
Olfr70	Olfactory receptor 70
Olfr700	Olfactory receptor 700
Olfr701	Olfactory receptor 701
Olfr702	Olfactory receptor 702
Olfr703	Olfactory receptor 703
Olfr704	Olfactory receptor 704
Olfr705	Olfactory receptor 705
Olfr706	Olfactory receptor 706
Olfr707	Olfactory receptor 707
Olfr71	Olfactory receptor 71
Olfr710	Olfactory receptor 710
Olfr711	Olfactory receptor 711
Olfr713	Olfactory receptor 713
Olfr714	Olfactory receptor 714
Olfr715	Olfactory receptor 715
Olfr716	Olfactory receptor 716
Olfr720	Olfactory receptor 720
Olfr722	Olfactory receptor 722
Olfr723	Olfactory receptor 723
Olfr724	Olfactory receptor 724
Olfr725	Olfactory receptor 725
Olfr726	Olfactory receptor 726
Olfr727	Olfactory receptor 727
Olfr728	Olfactory receptor 728
Olfr729	Olfactory receptor 729
Olfr73	Olfactory receptor 73
Olfr730	Olfactory receptor 730
Olfr731	Olfactory receptor 731
Olfr732	Olfactory receptor 732
Olfr733	Olfactory receptor 733
Olfr734	Olfactory receptor 734
Olfr735	Olfactory receptor 735
Olfr736	Olfactory receptor 736
Olfr738	Olfactory receptor 738
Olfr739	Olfactory receptor 739
Olfr74	Olfactory receptor 74
Olfr740	Olfactory receptor 740
Olfr741	Olfactory receptor 741
Olfr742	Olfactory receptor 742
Olfr743	Olfactory receptor 743
Olfr744	Olfactory receptor 744
Olfr745	Olfactory receptor 745
Olfr746	Olfactory receptor 746
Olfr747	Olfactory receptor 747
Olfr748	Olfactory receptor 748
Olfr749	Olfactory receptor 749
Olfr750	Olfactory receptor 750
Olfr76	Olfactory receptor 76
Olfr761	Olfactory receptor 761
Olfr763	Olfactory receptor 763
Olfr765	Olfactory receptor 765
Olfr767	Olfactory receptor 767
Olfr768	Olfactory receptor 768
Olfr769	Olfactory receptor 769
Olfr77	Olfactory receptor 77
Olfr770	Olfactory receptor 770
Olfr771	Olfactory receptor 771
Olfr772	Olfactory receptor 772
Olfr773	Olfactory receptor 773
Olfr774	Olfactory receptor 774
Olfr775	Olfactory receptor 775
Olfr776	Olfactory receptor 776
Olfr777	Olfactory receptor 777
Olfr78	Olfactory receptor 78
Olfr780	Olfactory receptor 780
Olfr781	Olfactory receptor 781
Olfr782	Olfactory receptor 782
Olfr784	Olfactory receptor 784
Olfr786	Olfactory receptor 786
Olfr787	Olfactory receptor 787
Olfr788	Olfactory receptor 788
Olfr790	Olfactory receptor 790
Olfr791	Olfactory receptor 791
Olfr792	Olfactory receptor 792
Olfr794	Olfactory receptor 794
Olfr796	Olfactory receptor 796
Olfr798	Olfactory receptor 798
Olfr799	Olfactory receptor 799
Olfr8	Olfactory receptor 8
Olfr800	Olfactory receptor 800
Olfr801	Olfactory receptor 801
Olfr802	Olfactory receptor 802
Olfr803	Olfactory receptor 803
Olfr804	Olfactory receptor 804
Olfr805	Olfactory receptor 805
Olfr806	Olfactory receptor 806
Olfr807	Olfactory receptor 807
Olfr808	Olfactory receptor 808
Olfr809	Olfactory receptor 809
Olfr810	Olfactory receptor 810
Olfr811	Olfactory receptor 811
Olfr812	Olfactory receptor 812
Olfr813	Olfactory receptor 813
Olfr814	Olfactory receptor 814
Olfr815	Olfactory receptor 815
Olfr816	Olfactory receptor 816
Olfr818	Olfactory receptor 818
Olfr819	Olfactory receptor 819
Olfr820	Olfactory receptor 820
Olfr821	Olfactory receptor 821
Olfr822	Olfactory receptor 822
Olfr823	Olfactory receptor 823
Olfr824	Olfactory receptor 824
Olfr825	Olfactory receptor 825
Olfr826	Olfactory receptor 826
Olfr827	Olfactory receptor 827
Olfr828	Olfactory receptor 828
Olfr829	Olfactory receptor 829
Olfr830	Olfactory receptor 830
Olfr832	Olfactory receptor 832
Olfr834	Olfactory receptor 834
Olfr835	Olfactory receptor 835
Olfr836	Olfactory receptor 836
Olfr837	Olfactory receptor 837
Olfr843	Olfactory receptor 843
Olfr845	Olfactory receptor 845
Olfr846	Olfactory receptor 846
Olfr847	Olfactory receptor 847
Olfr849	Olfactory receptor 849
Olfr850	Olfactory receptor 850
Olfr851	Olfactory receptor 851
Olfr853	Olfactory receptor 853
Olfr854	Olfactory receptor 854
Olfr855	Olfactory receptor 855
Olfr857	Olfactory receptor 857
Olfr859	Olfactory receptor 859
Olfr860	Olfactory receptor 860
Olfr862	Olfactory receptor 862
Olfr866	Olfactory receptor 866
Olfr867	Olfactory receptor 867
Olfr868	Olfactory receptor 868
Olfr869	Olfactory receptor 869
Olfr870	Olfactory receptor 870
Olfr871	Olfactory receptor 871
Olfr872	Olfactory receptor 872
Olfr873	Olfactory receptor 873
Olfr874	Olfactory receptor 874
Olfr875	Olfactory receptor 875
Olfr876	Olfactory receptor 876
Olfr877	Olfactory receptor 877
Olfr878	Olfactory receptor 878
Olfr881	Olfactory receptor 881
Olfr883	Olfactory receptor 883
Olfr884	Olfactory receptor 884
Olfr885	Olfactory receptor 885
Olfr887	Olfactory receptor 887
Olfr888	Olfactory receptor 888
Olfr889	Olfactory receptor 889
Olfr890	Olfactory receptor 890
Olfr891	Olfactory receptor 891
Olfr893	Olfactory receptor 893
Olfr894	Olfactory receptor 894
Olfr895	Olfactory receptor 895
Olfr898	Olfactory receptor 898
Olfr899	Olfactory receptor 899
Olfr9	Olfactory receptor 9
Olfr90	Olfactory receptor 90
Olfr900	Olfactory receptor 900
Olfr901	Olfactory receptor 901
Olfr902	Olfactory receptor 902
Olfr904	Olfactory receptor 904
Olfr905	Olfactory receptor 905
Olfr906	Olfactory receptor 906
Olfr907	Olfactory receptor 907
Olfr908	Olfactory receptor 908
Olfr91	Olfactory receptor 91
Olfr910	Olfactory receptor 910
Olfr912	Olfactory receptor 912
Olfr913	Olfactory receptor 913
Olfr914	Olfactory receptor 914
Olfr915	Olfactory receptor 915
Olfr916	Olfactory receptor 916
Olfr917	Olfactory receptor 917
Olfr918	Olfactory receptor 918
Olfr919	Olfactory receptor 919
Olfr92	Olfactory receptor 92
Olfr920	Olfactory receptor 920
Olfr921	Olfactory receptor 921
Olfr922	Olfactory receptor 922
Olfr923	Olfactory receptor 923
Olfr924	Olfactory receptor 924
Olfr926	Olfactory receptor 926
Olfr93	Olfactory receptor 93
Olfr930	Olfactory receptor 930
Olfr933	Olfactory receptor 933
Olfr934	Olfactory receptor 934
Olfr935	Olfactory receptor 935
Olfr936	Olfactory receptor 936
Olfr937	Olfactory receptor 937
Olfr938	Olfactory receptor 938
Olfr94	Olfactory receptor 94
Olfr943	Olfactory receptor 943
Olfr944	Olfactory receptor 944
Olfr945	Olfactory receptor 945
Olfr948	Olfactory receptor 948
Olfr95	Olfactory receptor 95
Olfr951	Olfactory receptor 951
Olfr952	Olfactory receptor 952
Olfr954	Olfactory receptor 954
Olfr955	Olfactory receptor 955
Olfr957	Olfactory receptor 957
Olfr958	Olfactory receptor 958
Olfr959	Olfactory receptor 959
Olfr96	Olfactory receptor 96
Olfr960	Olfactory receptor 960
Olfr961	Olfactory receptor 961
Olfr963	Olfactory receptor 963
Olfr965	Olfactory receptor 965
Olfr967	Olfactory receptor 967
Olfr968	Olfactory receptor 968
Olfr969	Olfactory receptor 969
Olfr97	Olfactory receptor 97
Olfr970	Olfactory receptor 970
Olfr971	Olfactory receptor 971
Olfr972	Olfactory receptor 972
Olfr974	Olfactory receptor 974
Olfr975	Olfactory receptor 975
Olfr976	Olfactory receptor 976
Olfr978	Olfactory receptor 978
Olfr979	Olfactory receptor 979
Olfr98	Olfactory receptor 98
Olfr980	Olfactory receptor 980
Olfr981	Olfactory receptor 981
Olfr982	Olfactory receptor 982
Olfr983	Olfactory receptor 983
Olfr984	Olfactory receptor 984
Olfr985	Olfactory receptor 985
Olfr986	Olfactory receptor 986
Olfr987	Olfactory receptor 987
Olfr988	Olfactory receptor 988
Olfr99	Olfactory receptor 99
Olfr992	Olfactory receptor 992
Olfr993	Olfactory receptor 993
Olfr994	Olfactory receptor 994
Olfr995	Olfactory receptor 995
Olfr996	Olfactory receptor 996
Olfr998	Olfactory receptor 998

## Sheet: S6i - Pheromone
Table S6. Sensory genes (mouse)
Mouse gene symbol	Name (description)
Taar1	Trace amine associated receptor 1 (detects volatile amine odorants)
Taar2	Trace amine associated receptor 2 (detects volatile amine odorants)
Taar3	Trace amine associated receptor 3 (detects volatile amine odorants)
Taar4	Trace amine associated receptor 4 (detects volatile amine odorants)
Taar5	Trace amine associated receptor 5 (detects volatile amine odorants)
Taar6	Trace amine associated receptor 6 (detects volatile amine odorants)
Taar9	Trace amine associated receptor 9 (detects volatile amine odorants)
Vmn1r1	Vomeronasal 1, receptor 1
Vmn1r10	Vomeronasal 1
Vmn1r100	Vomeronasal 1
Vmn1r101	Vomeronasal 1
Vmn1r103	Vomeronasal 1
Vmn1r104	Vomeronasal 1
Vmn1r107	Vomeronasal 1
Vmn1r11	Vomeronasal 1
Vmn1r111	Vomeronasal 1
Vmn1r112	Vomeronasal 1
Vmn1r113	Vomeronasal 1
Vmn1r114	Vomeronasal 1
Vmn1r115	Vomeronasal 1
Vmn1r116	Vomeronasal 1
Vmn1r117	Vomeronasal 1
Vmn1r118	Vomeronasal 1
Vmn1r119	Vomeronasal 1
Vmn1r12	Vomeronasal 1
Vmn1r120	Vomeronasal 1
Vmn1r121	Vomeronasal 1
Vmn1r122	Vomeronasal 1
Vmn1r123	Vomeronasal 1
Vmn1r124	Vomeronasal 1
Vmn1r125	Vomeronasal 1
Vmn1r126	Vomeronasal 1
Vmn1r127	Vomeronasal 1
Vmn1r128	Vomeronasal 1
Vmn1r129	Vomeronasal 1
Vmn1r13	Vomeronasal 1
Vmn1r130	Vomeronasal 1
Vmn1r132	Vomeronasal 1
Vmn1r135	Vomeronasal 1
Vmn1r137	Vomeronasal 1
Vmn1r139	Vomeronasal 1
Vmn1r14	Vomeronasal 1
Vmn1r142	Vomeronasal 1
Vmn1r143	Vomeronasal 1
Vmn1r148	Vomeronasal 1
Vmn1r149	Vomeronasal 1
Vmn1r15	Vomeronasal 1
Vmn1r151	Vomeronasal 1
Vmn1r152	Vomeronasal 1
Vmn1r155	Vomeronasal 1
Vmn1r157	Vomeronasal 1
Vmn1r158	Vomeronasal 1
Vmn1r159	Vomeronasal 1
Vmn1r16	Vomeronasal 1
Vmn1r160	Vomeronasal 1
Vmn1r163	Vomeronasal 1
Vmn1r165	Vomeronasal 1
Vmn1r167	Vomeronasal 1
Vmn1r168	Vomeronasal 1
Vmn1r169	Vomeronasal 1
Vmn1r17	Vomeronasal 1
Vmn1r170	Vomeronasal 1
Vmn1r171	Vomeronasal 1
Vmn1r172	Vomeronasal 1
Vmn1r173	Vomeronasal 1
Vmn1r174	Vomeronasal 1
Vmn1r175	Vomeronasal 1
Vmn1r176	Vomeronasal 1
Vmn1r177	Vomeronasal 1
Vmn1r178	Vomeronasal 1
Vmn1r179	Vomeronasal 1
Vmn1r18	Vomeronasal 1
Vmn1r180	Vomeronasal 1
Vmn1r181	Vomeronasal 1
Vmn1r183	Vomeronasal 1
Vmn1r184	Vomeronasal 1
Vmn1r185	Vomeronasal 1
Vmn1r186	Vomeronasal 1
Vmn1r187	Vomeronasal 1
Vmn1r188	Vomeronasal 1
Vmn1r189	Vomeronasal 1
Vmn1r19	Vomeronasal 1
Vmn1r191	Vomeronasal 1
Vmn1r192	Vomeronasal 1
Vmn1r193	Vomeronasal 1
Vmn1r194	Vomeronasal 1
Vmn1r195	Vomeronasal 1
Vmn1r196	Vomeronasal 1
Vmn1r197	Vomeronasal 1
Vmn1r198	Vomeronasal 1
Vmn1r199	Vomeronasal 1
Vmn1r2	Vomeronasal 1
Vmn1r20	Vomeronasal 1
Vmn1r200	Vomeronasal 1
Vmn1r201	Vomeronasal 1
Vmn1r202	Vomeronasal 1
Vmn1r203	Vomeronasal 1
Vmn1r204	Vomeronasal 1
Vmn1r205	Vomeronasal 1
Vmn1r206	Vomeronasal 1
Vmn1r208	Vomeronasal 1
Vmn1r209	Vomeronasal 1
Vmn1r21	Vomeronasal 1
Vmn1r210	Vomeronasal 1
Vmn1r211	Vomeronasal 1
Vmn1r212	Vomeronasal 1
Vmn1r213	Vomeronasal 1
Vmn1r214	Vomeronasal 1
Vmn1r215	Vomeronasal 1
Vmn1r216	Vomeronasal 1
Vmn1r217	Vomeronasal 1
Vmn1r218	Vomeronasal 1
Vmn1r219	Vomeronasal 1
Vmn1r22	Vomeronasal 1
Vmn1r220	Vomeronasal 1
Vmn1r221	Vomeronasal 1
Vmn1r222	Vomeronasal 1
Vmn1r223	Vomeronasal 1
Vmn1r224	Vomeronasal 1
Vmn1r225	Vomeronasal 1
Vmn1r226	Vomeronasal 1
Vmn1r227	Vomeronasal 1
Vmn1r228	Vomeronasal 1
Vmn1r229	Vomeronasal 1
Vmn1r23	Vomeronasal 1
Vmn1r230	Vomeronasal 1
Vmn1r231	Vomeronasal 1
Vmn1r232	Vomeronasal 1
Vmn1r233	Vomeronasal 1
Vmn1r234	Vomeronasal 1
Vmn1r235	Vomeronasal 1
Vmn1r236	Vomeronasal 1
Vmn1r237	Vomeronasal 1
Vmn1r238	Vomeronasal 1
Vmn1r24	Vomeronasal 1
Vmn1r25	Vomeronasal 1
Vmn1r26	Vomeronasal 1
Vmn1r27	Vomeronasal 1
Vmn1r28	Vomeronasal 1
Vmn1r29	Vomeronasal 1
Vmn1r3	Vomeronasal 1
Vmn1r30	Vomeronasal 1
Vmn1r31	Vomeronasal 1
Vmn1r32	Vomeronasal 1
Vmn1r33	Vomeronasal 1
Vmn1r34	Vomeronasal 1
Vmn1r35	Vomeronasal 1
Vmn1r36	Vomeronasal 1
Vmn1r37	Vomeronasal 1
Vmn1r38	Vomeronasal 1
Vmn1r39	Vomeronasal 1
Vmn1r4	Vomeronasal 1
Vmn1r40	Vomeronasal 1
Vmn1r41	Vomeronasal 1
Vmn1r42	Vomeronasal 1
Vmn1r43	Vomeronasal 1
Vmn1r44	Vomeronasal 1
Vmn1r45	Vomeronasal 1
Vmn1r46	Vomeronasal 1
Vmn1r47	Vomeronasal 1
Vmn1r48	Vomeronasal 1
Vmn1r49	Vomeronasal 1
Vmn1r5	Vomeronasal 1
Vmn1r50	Vomeronasal 1
Vmn1r51	Vomeronasal 1
Vmn1r52	Vomeronasal 1
Vmn1r53	Vomeronasal 1
Vmn1r54	Vomeronasal 1
Vmn1r55	Vomeronasal 1
Vmn1r56	Vomeronasal 1
Vmn1r57	Vomeronasal 1
Vmn1r58	Vomeronasal 1
Vmn1r59	Vomeronasal 1
Vmn1r6	Vomeronasal 1
Vmn1r60	Vomeronasal 1
Vmn1r61	Vomeronasal 1
Vmn1r62	Vomeronasal 1
Vmn1r63	Vomeronasal 1
Vmn1r64	Vomeronasal 1
Vmn1r65	Vomeronasal 1
Vmn1r66	Vomeronasal 1
Vmn1r67	Vomeronasal 1
Vmn1r68	Vomeronasal 1
Vmn1r69	Vomeronasal 1
Vmn1r7	Vomeronasal 1
Vmn1r70	Vomeronasal 1
Vmn1r71	Vomeronasal 1
Vmn1r72	Vomeronasal 1
Vmn1r73	Vomeronasal 1
Vmn1r74	Vomeronasal 1
Vmn1r75	Vomeronasal 1
Vmn1r76	Vomeronasal 1
Vmn1r77	Vomeronasal 1
Vmn1r78	Vomeronasal 1
Vmn1r79	Vomeronasal 1
Vmn1r8	Vomeronasal 1
Vmn1r80	Vomeronasal 1
Vmn1r81	Vomeronasal 1
Vmn1r82	Vomeronasal 1
Vmn1r83	Vomeronasal 1
Vmn1r84	Vomeronasal 1
Vmn1r85	Vomeronasal 1
Vmn1r86	Vomeronasal 1
Vmn1r87	Vomeronasal 1
Vmn1r88	Vomeronasal 1
Vmn1r89	Vomeronasal 1
Vmn1r9	Vomeronasal 1
Vmn1r90	Vomeronasal 1
Vmn1r91	Vomeronasal 1
Vmn1r93	Vomeronasal 1
Vmn1r94	Vomeronasal 1
Vmn1r95	Vomeronasal 1
Vmn2r1	Vomeronasal 2
Vmn2r10	Vomeronasal 2
Vmn2r100	Vomeronasal 2
Vmn2r101	Vomeronasal 2
Vmn2r102	Vomeronasal 2
Vmn2r103	Vomeronasal 2
Vmn2r104	Vomeronasal 2
Vmn2r105	Vomeronasal 2
Vmn2r106	Vomeronasal 2
Vmn2r107	Vomeronasal 2
Vmn2r108	Vomeronasal 2
Vmn2r109	Vomeronasal 2
Vmn2r11	Vomeronasal 2
Vmn2r110	Vomeronasal 2
Vmn2r111	Vomeronasal 2
Vmn2r112	Vomeronasal 2
Vmn2r113	Vomeronasal 2
Vmn2r114	Vomeronasal 2
Vmn2r115	Vomeronasal 2
Vmn2r116	Vomeronasal 2
Vmn2r117	Vomeronasal 2
Vmn2r118	Vomeronasal 2
Vmn2r12	Vomeronasal 2
Vmn2r120	Vomeronasal 2
Vmn2r121	Vomeronasal 2
Vmn2r122	Vomeronasal 2
Vmn2r123	Vomeronasal 2
Vmn2r13	Vomeronasal 2
Vmn2r14	Vomeronasal 2
Vmn2r15	Vomeronasal 2
Vmn2r16	Vomeronasal 2
Vmn2r17	Vomeronasal 2
Vmn2r18	Vomeronasal 2
Vmn2r19	Vomeronasal 2
Vmn2r2	Vomeronasal 2
Vmn2r20	Vomeronasal 2
Vmn2r21	Vomeronasal 2
Vmn2r22	Vomeronasal 2
Vmn2r23	Vomeronasal 2
Vmn2r24	Vomeronasal 2
Vmn2r25	Vomeronasal 2
Vmn2r26	Vomeronasal 2
Vmn2r27	Vomeronasal 2
Vmn2r28	Vomeronasal 2
Vmn2r29	Vomeronasal 2
Vmn2r3	Vomeronasal 2
Vmn2r30	Vomeronasal 2
Vmn2r31	Vomeronasal 2
Vmn2r32	Vomeronasal 2
Vmn2r33	Vomeronasal 2
Vmn2r34	Vomeronasal 2
Vmn2r35	Vomeronasal 2
Vmn2r36	Vomeronasal 2
Vmn2r37	Vomeronasal 2
Vmn2r38	Vomeronasal 2
Vmn2r39	Vomeronasal 2
Vmn2r4	Vomeronasal 2
Vmn2r40	Vomeronasal 2
Vmn2r41	Vomeronasal 2
Vmn2r42	Vomeronasal 2
Vmn2r43	Vomeronasal 2
Vmn2r44	Vomeronasal 2
Vmn2r45	Vomeronasal 2
Vmn2r46	Vomeronasal 2
Vmn2r47	Vomeronasal 2
Vmn2r48	Vomeronasal 2
Vmn2r49	Vomeronasal 2
Vmn2r5	Vomeronasal 2
Vmn2r50	Vomeronasal 2
Vmn2r51	Vomeronasal 2
Vmn2r52	Vomeronasal 2
Vmn2r53	Vomeronasal 2
Vmn2r54	Vomeronasal 2
Vmn2r55	Vomeronasal 2
Vmn2r56	Vomeronasal 2
Vmn2r57	Vomeronasal 2
Vmn2r58	Vomeronasal 2
Vmn2r59	Vomeronasal 2
Vmn2r6	Vomeronasal 2
Vmn2r60	Vomeronasal 2
Vmn2r61	Vomeronasal 2
Vmn2r62	Vomeronasal 2
Vmn2r63	Vomeronasal 2
Vmn2r65	Vomeronasal 2
Vmn2r66	Vomeronasal 2
Vmn2r67	Vomeronasal 2
Vmn2r69	Vomeronasal 2
Vmn2r7	Vomeronasal 2
Vmn2r70	Vomeronasal 2
Vmn2r71	Vomeronasal 2
Vmn2r73	Vomeronasal 2
Vmn2r74	Vomeronasal 2
Vmn2r75	Vomeronasal 2
Vmn2r76	Vomeronasal 2
Vmn2r77	Vomeronasal 2
Vmn2r78	Vomeronasal 2
Vmn2r79	Vomeronasal 2
Vmn2r8	Vomeronasal 2
Vmn2r80	Vomeronasal 2
Vmn2r81	Vomeronasal 2
Vmn2r82	Vomeronasal 2
Vmn2r83	Vomeronasal 2
Vmn2r84	Vomeronasal 2
Vmn2r85	Vomeronasal 2
Vmn2r86	Vomeronasal 2
Vmn2r87	Vomeronasal 2
Vmn2r88	Vomeronasal 2
Vmn2r89	Vomeronasal 2
Vmn2r9	Vomeronasal 2
Vmn2r90	Vomeronasal 2
Vmn2r91	Vomeronasal 2
Vmn2r92	Vomeronasal 2
Vmn2r93	Vomeronasal 2
Vmn2r94	Vomeronasal 2
Vmn2r95	Vomeronasal 2
Vmn2r96	Vomeronasal 2
Vmn2r97	Vomeronasal 2
Vmn2r98	Vomeronasal 2
Vmn2r99	Vomeronasal 2

## Sheet: S6j - Taste
Table S6. Sensory genes (mouse)
Mouse gene symbol	Name (description)
Tas1r1	Taste receptor, 1R1 (umami)
Tas1r2	Taste 1 receptor, member 2 (sweet)
Tas1r3	Taste 1 receptor, member 3 (co-receptor, sweet & umami)
Pkd2l1	Polycystin 2 like 1 transient receptor potential cation channel (sour)
Pkd1l3	Polycystin 2 like 1 transient receptor potential interacting channel (co-receptor, sour)
Otop1	Otopetrin (sour)
Tas2r102	Taste 2 receptor (bitter)
Tas2r103	Taste 2 receptor (bitter)
Tas2r104	Taste 2 receptor (bitter)
Tas2r105	Taste 2 receptor (bitter)
Tas2r106	Taste 2 receptor (bitter)
Tas2r107	Taste 2 receptor (bitter)
Tas2r108	Taste 2 receptor (bitter)
Tas2r109	Taste 2 receptor (bitter)
Tas2r110	Taste 2 receptor (bitter)
Tas2r113	Taste 2 receptor (bitter)
Tas2r114	Taste 2 receptor (bitter)
Tas2r115	Taste 2 receptor (bitter)
Tas2r116	Taste 2 receptor (bitter)
Tas2r117	Taste 2 receptor (bitter)
Tas2r118	Taste 2 receptor (bitter)
Tas2r119	Taste 2 receptor (bitter)
Tas2r120	Taste 2 receptor (bitter)
Tas2r121	Taste 2 receptor (bitter)
Tas2r122	Taste 2 receptor (bitter)
Tas2r123	Taste 2 receptor (bitter)
Tas2r124	Taste 2 receptor (bitter)
Tas2r125	Taste 2 receptor (bitter)
Tas2r126	Taste 2 receptor (bitter)
Tas2r129	Taste 2 receptor (bitter)
Tas2r130	Taste 2 receptor (bitter)
Tas2r131	Taste 2 receptor (bitter)
Tas2r134	Taste 2 receptor (bitter)
Tas2r135	Taste 2 receptor (bitter)
Tas2r136	Taste 2 receptor (bitter)
Tas2r137	Taste 2 receptor (bitter)
Tas2r138	Taste 2 receptor (bitter)
Tas2r139	Taste 2 receptor (bitter)
Tas2r140	Taste 2 receptor (bitter)
Tas2r143	Taste 2 receptor (bitter)
Tas2r144	Taste 2 receptor (bitter)

[truncated: 2 more sheets: S6k - K2P_channels, S6l - Kv channels]
