# Supplementary material for: Neuroendocrinology of the lung revealed by single-cell RNA sequencing
Source: eLife. 2022 Dec 5;11:e78216. doi: 10.7554/eLife.78216 (PMC9721618; doi:10.7554/eLife.78216)
Supplement: Supplementary file 7. — (a) Mechanical. (b) Thermal. (c) Mrgprs. (d) Acid. (e) Oxygen. (f) CO2. (g) TRP family. (h) Olfactory. (i) Pheromone. (j) Taste. (k) K2P channels. (l) Kv channels. [file elife-78216-supp7.xlsx]

## Sheet: S7a  - Mechanical
Table S7. Sensory genes (human)
Human gene symbol	Name (description**)
PIEZO1*	Piezo-type mechanosensitive ion channel component 2
PIEZO2	Piezo-type mechanosensitive ion channel component 1
CASR	Calcium-sensing receptor (proposed mechanotransducer in NEBs)
TRPC1	Transient receptor potential cation channel subfamily C, member 1
TRPC2	Transient receptor potential cation channel subfamily C, member 2
TRPC3	Transient receptor potential cation channel subfamily C, member 3
TRPC4	Transient receptor potential cation channel subfamily C, member 4
TRPC5	Transient receptor potential cation channel subfamily C, member 5 (reported mechanotransducer in NEBs)
TRPC6	Transient receptor potential cation channel subfamily C, member 6
KCNK2	TREK-1 (Mechanically-activated potassium 2-pore ion channel)
KCNK4	TRAAK (Mechanically-activated potassium 2-pore ion channel)
KCNK10	TREK-2 (Mechanically-activated potassium 2-pore ion channel)
PKD1	Polycystin 1 (Cilia mechanotransduction)
PKD2	Polycystin 2 (Cilia mechanotransduction)
PKD1L1	Polycystin1-like 1. Transient receptor potential interacting (Cilia mechanotransduction)
PKD1L2	Polycystin1-like 2. Transient receptor potential interacting (Cilia mechanotransduction)
TMC1	Transmembrane channel like protein 1 (component of mechanosensitive complex, inner ear hair cells)
TMC2	Transmembrane channel like protein 2 (component of mechanosensitive complex, inner ear hair cells)
LHFPL5	Tetraspan membrane protein of hair cell stereocilia (component of mechanosensitive complex, inner ear hair cells)
TMIE	Transmembrane inner ear expressed gene (component of mechanosensitive complex, inner ear hair cells)
STOML3	Stomatin-like gene (modulates mechanosensitive DRG neurons)
TMEM63A	Homolog of Arabidopsis mechanosensor OSCA (induces stretch-activated currents in heterologus in vitro system)
*Previously reported to be expressed in PNECs
**Description of structure or function where known

## Sheet: S7b - Thermal
Table S7. Sensory genes (human)
Human gene symbol	Name (description)
TRPA1	Transient receptor potential cation channel-subfamily A, member 1 (temp sensor)
TRPV1	Transient receptor potential cation channel-subfamily V, member 1 (heat sensor)
TRPV2	Transient receptor potential cation channel-subfamily V, member 2 (heat sensor)
TRPV3	Transient receptor potential cation channel-subfamily V, member 3 (temp sensor)
TRPV4	Transient receptor potential cation channel-subfamily V, member 4 (heat sensor)
TRPM8	Transient receptor potential cation channel-subfamily M, member 9 (cold sensor)
GRIK2	Glutamate receptor, ionotropic, kainate 2, GluK2

## Sheet: S7c - Mrgpr
Table S7. Sensory genes (human)
Human gene symbol	Name (description)
MRGPRD	MAS-related G-protein coupled receptor (itch receptor)
MRGPRE	MAS-related G-protein coupled receptor (itch receptor)
MRGPRF	MAS-related G-protein coupled receptor (itch receptor)
MRGPRX3	MAS-related G-protein coupled receptor (itch receptor)
MRGPRX4	MAS-related G-protein coupled receptor (itch receptor)
MRGPRX1	MAS-related G-protein coupled receptor (regulates inflammatory response)
MRGPRX2	MAS-related G-protein coupled receptor (regulates inflammatory response)

## Sheet: S7d - Acid
Table S7. Sensory genes (human)
Human gene symbol	Name (description)
ASIC1	Acid-sensing ion channel 1 (proton-gated Na channel)
ASIC2	Acid-sensing ion channel 2 (proton-gated Na channel)
ASIC3	Acid-sensing ion channel 3 (proton-gated Na channel)
ASIC4	Acid-sensing ion channel 4 (proton-gated Na channel)
KCNK3	Potassium 2 pore domain channel subfamily K, member 3, TASK-1
KCNK5	Potassium 2 pore domain channel subfamily K, member 5
KCNK9	Potassium 2 pore domain channel subfamily K, member 9
GPR4	G-protein coupled receptor 4
GPR132	G-protein coupled receptor 132
GPR65	G-protein coupled receptor 65
GPR68	G-protein coupled receptor 68 (proton-sensing GPCR)

## Sheet: S7e - Oxygen
Table S7. Sensory genes (human)
Human gene symbol	Name (description)
HIF1A	Hypoxia inducible factor 1, subunit alpha (hypoxia response regulator, transcription factor subunit)
ARNT	Aryl hydrocarbon receptor nuclear translocator (hypoxia response regulator, transcription factor subunit)
EPAS1	Endothelial PAS domain, Hif2a (hypoxia response regulator, transcription factor subunit)
HIF3A	Hypoxia inducible factor 3, subunit alpha (hypoxia response regulator, transcription factor subunit)
EGLN1	Hypoxia-inducible factor prolyl hydroxylase 2
EGLN2	Egl-9 family hypoxia inducible factor 2
EGLN3	Egl-9 family hypoxia inducible factor 3
HIF1AN	Hypoxia-inducible factor 1-alpha inhibitor
NOX1	NADPH-oxidase 1 (membrane-bound enzyme complex, regulates reactive oxygen species)
NOX3	NADPH-oxidase 3 (membrane-bound enzyme complex, regulates reactive oxygen species)
NOX4*	NADPH-oxidase 4 (membrane-bound enzyme complex, regulates reactive oxygen species)
CYBB	Cytochrome b245 beta chain, p91phox, NOX2 (catlytic subunit of NADPH oxidase)
CYBA	Cytochrome b245 alpha chain, p22phox (subunit of NADPH oxidase)
NCF1*	Neutrophil cytosolic factor 1- p47phox (subunit of NADPH oxidase)
NCF2*	Neutrophil cytsolic factor 2 -p67-phox (subunit of NADPH oxidase)
RAC1	Rac family small GTPase (cytosolic subunit of NADPH oxidase)
RAC2	Rac family small GTPase (cytosolic subunit of NADPH oxidase)
KCNK3	Potassium 2 pore domain channel subfamily K, member 3, TASK-1 (acid-sensitive K channel)
KCNK9	Potassium 2 pore domain channel, member 9, TASK-3 (acid-sensitive K channel)
KCNC3	Potassium voltage- gated channel subfamily C, member 3, Kv3.3 (voltage-gated K channel)
KCNC4	Potassium voltage- gated channel subfamily C, member 4, Kv3.4 (voltage-gated K channel)
KCND3	Potassium voltage- gated channel subfamily d, member 3, Kv4.3 (voltage-gated K channel)
OR51E2	Olfactory receptor 51E2 (ortholog of lactate-activated GPCR in mouse carotid body hypoxia pathway)
OR51E1	Olfactory receptor (butyrate sensing)

## Sheet: S7f - CO2
Table S7. Sensory genes (human)
Human gene symbol	Name (description)
CA1	Carbonic anhydrase 1 (metalloenzyme, catalyzes interconversion of CO2 and H20)
CA2	Carbonic anhydrase 2 (metalloenzyme, catalyzes interconversion of CO2 and H20)
CA3	Carbonic anhydrase 3 (metalloenzyme, catalyzes interconversion of CO2 and H20)
CA4	Carbonic anhydrase 4 (metalloenzyme, catalyzes interconversion of CO2 and H20)
CA5A	Carbonic anhydrase 5a (metalloenzyme, catalyzes interconversion of CO2 and H20)
CA5B	Carbonic anhydrase 5b (metalloenzyme, catalyzes interconversion of CO2 and H20)
CA6	Carbonic anhydrase 6 (metalloenzyme, catalyzes interconversion of CO2 and H20)
CA7	Carbonic anhydrase 7 (metalloenzyme, catalyzes interconversion of CO2 and H20)
CA8	Carbonic anhydrase 8 (acatalytic)
CA9	Carbonic anhydrase 9 (metalloenzyme, catalyzes interconversion of CO2 and H20)
CA10	Carbonic anhydrase 10 (acatalytic)
CA11	Carbonic anhydrase 11 (acatalytic)
CA12	Carbonic anhydrase 12 (metalloenzyme, catalyzes interconversion of CO2 and H20)
CA13	Carbonic anhydrase 13 (metalloenzyme, catalyzes interconversion of CO2 and H20)
CA14	Carbonic anhydrase 14 (metalloenzyme, catalyzes interconversion of CO2 and H20)

## Sheet: S7g - TRP
Table S7. Sensory genes (human)
Human gene symbol	Name (description)
TRPC1	Transient receptor potential channel C1
TRPC2	Transient receptor potential channel C2
TRPC3	Transient receptor potential channel C3
TRPC4	Transient receptor potential channel C4
TRPC5	Transient receptor potential channel C5
TRPC6	Transient receptor potential channel C6
TRPC7	Transient receptor potential channel C7
TRPV1	Vanilloid receptor (heat sensor)
TRPV2	Vanilloid receptor
TRPV3	Vanilloid receptor
TRPV4	Vanilloid receptor
TRPV5	Vanilloid receptor
TRPV6	Vanilloid receptor
TRPM1	Transient receptor potential cation channel subfamily M, member 1 (transduces photoreceptive response in retinal bipolar cells)
TRPM2	Transient receptor potential cation channel subfamily M, member 2 (diverse sensory functions)
TRPM3	Transient receptor potential cation channel subfamily M, member 3 (diverse sensory functions)
TRPM4	Transient receptor potential cation channel subfamily M, member 4 (diverse sensory functions)
TRPM5	Transient receptor potential cation channel subfamily M, member 5 (diverse sensory functions)
TRPM6	Transient receptor potential cation channel subfamily M, member 6 (diverse sensory functions)
TRPM7	Transient receptor potential cation channel subfamily M, member 7 (diverse sensory functions)
TRPM8	Transient receptor potential cation channel subfamily M, member 8 (cold sensor)
TRPA1	Transient receptor potential cation channel subfamily A, member 1 (diverse sensory functions)
PKD1	Polycystin 2
PKD2	Polycystic kidney disease 2-like 1, transient receptor potential channel, TRPP3
PKD2L1	Polycystic kidney disease 2-like 2, transient receptor potential channel, TRPP5
PKD2L2	Poycystin, TRPP1
MCOLN1	Mucolipin 1, trasient receptor potential cation channel (vesicular trafficking, exocytosis)
MCOLN2	Mucolipin 2, trasient receptor potential cation channel (intracellular membrane transport)
MCOLN3	Mucolipin 3, trasient receptor potential cation channel (sensory transduction)

## Sheet: S7h - Olfactory
Table S7. Sensory genes (human)
Human gene symbol	Name (description)
OR51E1	Olfactory receptor 51E1
OR7D2	Olfactory receptor 7D2
OR11G2	Olfactory receptor 11G2
OR13A1	Olfactory receptor 13A1
OR2H1	Olfactory receptor 2H1
OR2T8	Olfactory receptor 2T8
OR2V1	Olfactory receptor 2V1
OR4D10	Olfactory receptor 4D10
OR51E2	Olfactory receptor 51E2
OR51T1	Olfactory receptor 51T1
OR52R1	Olfactory receptor 52R1
OR5B21	Olfactory receptor 5B21
OR5B3	Olfactory receptor 5B3
OR5H14	Olfactory receptor 5H14
OR5P2	Olfactory receptor 5P2
OR6F1	Olfactory receptor 6F1
OR6N2	Olfactory receptor 6N2
OR10A2	Olfactory receptor 10A2
OR10A3	Olfactory receptor 10A3
OR10A4	Olfactory receptor 10A4
OR10A5	Olfactory receptor 10A5
OR10A6	Olfactory receptor 10A6
OR10A7	Olfactory receptor 10A7
OR10AD1	Olfactory receptor 10AD1
OR10AG1	Olfactory receptor 10AG1
OR10C1	Olfactory receptor 10C1
OR10G2	Olfactory receptor 10G2
OR10G3	Olfactory receptor 10G3
OR10G4	Olfactory receptor 10G4
OR10G7	Olfactory receptor 10G7
OR10G8	Olfactory receptor 10G8
OR10G9	Olfactory receptor 10G9
OR10H1	Olfactory receptor 10H1
OR10H2	Olfactory receptor 10H2
OR10H3	Olfactory receptor 10H3
OR10H4	Olfactory receptor 10H4
OR10H5	Olfactory receptor 10H5
OR10J1	Olfactory receptor 10J1
OR10J3	Olfactory receptor 10J3
OR10J5	Olfactory receptor 10J5
OR10K1	Olfactory receptor 10K1
OR10K2	Olfactory receptor 10K2
OR10P1	Olfactory receptor 10P1
OR10Q1	Olfactory receptor 10Q1
OR10R2	Olfactory receptor 10R2
OR10S1	Olfactory receptor 10S1
OR10T2	Olfactory receptor 10T2
OR10V1	Olfactory receptor 10V1
OR10V2P	Olfactory receptor 10V2P
OR10W1	Olfactory receptor 10W1
OR10X1	Olfactory receptor 10X1
OR10Z1	Olfactory receptor 10Z1
OR11A1	Olfactory receptor 11A1
OR11H1	Olfactory receptor 11H1
OR11H12	Olfactory receptor 11H12
OR11H2	Olfactory receptor 11H2
OR11H4	Olfactory receptor 11H4
OR11H6	Olfactory receptor 11H6
OR11L1	Olfactory receptor 11L1
OR12D2	Olfactory receptor 12D2
OR12D3	Olfactory receptor 12D3
OR13C2	Olfactory receptor 13C2
OR13C3	Olfactory receptor 13C3
OR13C4	Olfactory receptor 13C4
OR13C5	Olfactory receptor 13C5
OR13C8	Olfactory receptor 13C8
OR13C9	Olfactory receptor 13C9
OR13D1	Olfactory receptor 13D1
OR13F1	Olfactory receptor 13F1
OR13G1	Olfactory receptor 13G1
OR13H1	Olfactory receptor 13H1
OR13J1	Olfactory receptor 13J1
OR14A16	Olfactory receptor 14A16
OR14C36	Olfactory receptor 14C36
OR14I1	Olfactory receptor 14I1
OR14J1	Olfactory receptor 14J1
OR1A1	Olfactory receptor 1A1
OR1A2	Olfactory receptor 1A2
OR1B1	Olfactory receptor 1B1
OR1C1	Olfactory receptor 1C1
OR1D2	Olfactory receptor 1D2
OR1D4	Olfactory receptor 1D4
OR1D5	Olfactory receptor 1D5
OR1E1	Olfactory receptor 1E1
OR1E2	Olfactory receptor 1E2
OR1F1	Olfactory receptor 1F1
OR1F2P	Olfactory receptor 1F2P
OR1G1	Olfactory receptor 1G1
OR1I1	Olfactory receptor 1I1
OR1J1	Olfactory receptor 1J1
OR1J2	Olfactory receptor 1J2
OR1J4	Olfactory receptor 1J4
OR1K1	Olfactory receptor 1K1
OR1L1	Olfactory receptor 1L1
OR1L3	Olfactory receptor 1L3
OR1L4	Olfactory receptor 1L4
OR1L6	Olfactory receptor 1L6
OR1L8	Olfactory receptor 1L8
OR1M1	Olfactory receptor 1M1
OR1N1	Olfactory receptor 1N1
OR1N2	Olfactory receptor 1N2
OR1Q1	Olfactory receptor 1Q1
OR1S1	Olfactory receptor 1S1
OR1S2	Olfactory receptor 1S2
OR2A1	Olfactory receptor 2A1
OR2A12	Olfactory receptor 2A12
OR2A14	Olfactory receptor 2A14
OR2A2	Olfactory receptor 2A2
OR2A20P	Olfactory receptor 2A20P
OR2A25	Olfactory receptor 2A25
OR2A4	Olfactory receptor 2A4
OR2A42	Olfactory receptor 2A42
OR2A5	Olfactory receptor 2A5
OR2A7	Olfactory receptor 2A7
OR2A9P	Olfactory receptor 2A9P
OR2AE1	Olfactory receptor 2AE1
OR2AG1	Olfactory receptor 2AG1
OR2AG2	Olfactory receptor 2AG2
OR2AK2	Olfactory receptor 2AK2
OR2AP1	Olfactory receptor 2AP1
OR2AT4	Olfactory receptor 2AT4
OR2B11	Olfactory receptor 2B11
OR2B2	Olfactory receptor 2B2
OR2B3	Olfactory receptor 2B3
OR2B6	Olfactory receptor 2B6
OR2C1	Olfactory receptor 2C1
OR2C3	Olfactory receptor 2C3
OR2D2	Olfactory receptor 2D2
OR2D3	Olfactory receptor 2D3
OR2F1*	Olfactory receptor 2F1*
OR2F2	Olfactory receptor 2F2
OR2G2	Olfactory receptor 2G2
OR2G3	Olfactory receptor 2G3
OR2G6	Olfactory receptor 2G6
OR2H2	Olfactory receptor 2H2
OR2J2	Olfactory receptor 2J2
OR2J3	Olfactory receptor 2J3
OR2K2	Olfactory receptor 2K2
OR2L13	Olfactory receptor 2L13
OR2L1P	Olfactory receptor 2L1P
OR2L2	Olfactory receptor 2L2
OR2L3	Olfactory receptor 2L3
OR2L5	Olfactory receptor 2L5
OR2L8	Olfactory receptor 2L8
OR2M1P	Olfactory receptor 2M1P
OR2M2	Olfactory receptor 2M2
OR2M3	Olfactory receptor 2M3
OR2M4	Olfactory receptor 2M4
OR2M5	Olfactory receptor 2M5
OR2M7	Olfactory receptor 2M7
OR2S2	Olfactory receptor 2S2
OR2T1	Olfactory receptor 2T1
OR2T10	Olfactory receptor 2T10
OR2T11	Olfactory receptor 2T11
OR2T12	Olfactory receptor 2T12
OR2T2	Olfactory receptor 2T2
OR2T27	Olfactory receptor 2T27
OR2T29	Olfactory receptor 2T29
OR2T3	Olfactory receptor 2T3
OR2T33	Olfactory receptor 2T33
OR2T34	Olfactory receptor 2T34
OR2T35	Olfactory receptor 2T35
OR2T4	Olfactory receptor 2T4
OR2T5	Olfactory receptor 2T5
OR2T6	Olfactory receptor 2T6
OR2V2	Olfactory receptor 2V2
OR2W1*	Olfactory receptor 2W1*
OR2W3	Olfactory receptor 2W3
OR2W5	Olfactory receptor 2W5
OR2Y1	Olfactory receptor 2Y1
OR2Z1	Olfactory receptor 2Z1
OR3A1	Olfactory receptor 3A1
OR3A2	Olfactory receptor 3A2
OR3A3	Olfactory receptor 3A3
OR3A4P	Olfactory receptor 3A4P
OR4A15	Olfactory receptor 4A15
OR4A16	Olfactory receptor 4A16
OR4A47	Olfactory receptor 4A47
OR4A5	Olfactory receptor 4A5
OR4B1	Olfactory receptor 4B1
OR4C11	Olfactory receptor 4C11
OR4C12	Olfactory receptor 4C12
OR4C13	Olfactory receptor 4C13
OR4C15	Olfactory receptor 4C15
OR4C16	Olfactory receptor 4C16
OR4C3	Olfactory receptor 4C3
OR4C45	Olfactory receptor 4C45
OR4C46	Olfactory receptor 4C46
OR4C6	Olfactory receptor 4C6
OR4D1	Olfactory receptor 4D1
OR4D11	Olfactory receptor 4D11
OR4D2	Olfactory receptor 4D2
OR4D5	Olfactory receptor 4D5
OR4D6	Olfactory receptor 4D6
OR4D9	Olfactory receptor 4D9
OR4E2	Olfactory receptor 4E2
OR4F15	Olfactory receptor 4F15
OR4F16	Olfactory receptor 4F16
OR4F17	Olfactory receptor 4F17
OR4F21	Olfactory receptor 4F21
OR4F29	Olfactory receptor 4F29
OR4F3	Olfactory receptor 4F3
OR4F4	Olfactory receptor 4F4
OR4F5	Olfactory receptor 4F5
OR4F6	Olfactory receptor 4F6
OR4K1	Olfactory receptor 4K1
OR4K13	Olfactory receptor 4K13
OR4K14	Olfactory receptor 4K14
OR4K15	Olfactory receptor 4K15
OR4K17	Olfactory receptor 4K17
OR4K2	Olfactory receptor 4K2
OR4K5	Olfactory receptor 4K5
OR4L1	Olfactory receptor 4L1
OR4M1	Olfactory receptor 4M1
OR4M2	Olfactory receptor 4M2
OR4N2	Olfactory receptor 4N2
OR4N3P	Olfactory receptor 4N3P
OR4N4	Olfactory receptor 4N4
OR4N5	Olfactory receptor 4N5
OR4P4	Olfactory receptor 4P4
OR4Q3	Olfactory receptor 4Q3
OR4S1	Olfactory receptor 4S1
OR4S2	Olfactory receptor 4S2
OR4X1	Olfactory receptor 4X1
OR4X2	Olfactory receptor 4X2
OR51A2	Olfactory receptor 51A2
OR51A4	Olfactory receptor 51A4
OR51A7	Olfactory receptor 51A7
OR51B2	Olfactory receptor 51B2
OR51B4	Olfactory receptor 51B4
OR51B5	Olfactory receptor 51B5
OR51B6	Olfactory receptor 51B6
OR51D1	Olfactory receptor 51D1
OR51F1	Olfactory receptor 51F1
OR51F2	Olfactory receptor 51F2
OR51G1	Olfactory receptor 51G1
OR51G2	Olfactory receptor 51G2
OR51I1	Olfactory receptor 51I1
OR51I2	Olfactory receptor 51I2
OR51L1	Olfactory receptor 51L1
OR51M1	Olfactory receptor 51M1
OR51Q1	Olfactory receptor 51Q1
OR51S1	Olfactory receptor 51S1
OR51V1	Olfactory receptor 51V1
OR52A1	Olfactory receptor 52A1
OR52A5	Olfactory receptor 52A5
OR52B2	Olfactory receptor 52B2
OR52B4	Olfactory receptor 52B4
OR52B6	Olfactory receptor 52B6
OR52D1	Olfactory receptor 52D1
OR52E2	Olfactory receptor 52E2
OR52E4	Olfactory receptor 52E4
OR52E6	Olfactory receptor 52E6
OR52E8	Olfactory receptor 52E8
OR52H1	Olfactory receptor 52H1
OR52I1	Olfactory receptor 52I1
OR52I2	Olfactory receptor 52I2
OR52J3	Olfactory receptor 52J3
OR52K1	Olfactory receptor 52K1
OR52K2	Olfactory receptor 52K2
OR52L1	Olfactory receptor 52L1
OR52M1	Olfactory receptor 52M1
OR52N1	Olfactory receptor 52N1
OR52N2	Olfactory receptor 52N2
OR52N4	Olfactory receptor 52N4
OR52N5	Olfactory receptor 52N5
OR52W1	Olfactory receptor 52W1
OR56A1	Olfactory receptor 56A1
OR56A3	Olfactory receptor 56A3
OR56A4	Olfactory receptor 56A4
OR56A5	Olfactory receptor 56A5
OR56B1	Olfactory receptor 56B1
OR56B4	Olfactory receptor 56B4
OR5A1	Olfactory receptor 5A1
OR5A2	Olfactory receptor 5A2
OR5AC2	Olfactory receptor 5AC2
OR5AK2	Olfactory receptor 5AK2
OR5AK4P	Olfactory receptor 5AK4P
OR5AN1	Olfactory receptor 5AN1
OR5AP2	Olfactory receptor 5AP2
OR5AR1	Olfactory receptor 5AR1
OR5AS1	Olfactory receptor 5AS1
OR5AU1	Olfactory receptor 5AU1
OR5B12	Olfactory receptor 5B12
OR5B17	Olfactory receptor 5B17
OR5B2	Olfactory receptor 5B2
OR5C1	Olfactory receptor 5C1
OR5D13	Olfactory receptor 5D13
OR5D14	Olfactory receptor 5D14
OR5D16	Olfactory receptor 5D16
OR5D18	Olfactory receptor 5D18
OR5E1P	Olfactory receptor 5E1P
OR5F1	Olfactory receptor 5F1
OR5H1	Olfactory receptor 5H1
OR5H15	Olfactory receptor 5H15
OR5H2	Olfactory receptor 5H2
OR5H6	Olfactory receptor 5H6
OR5I1	Olfactory receptor 5I1
OR5J2	Olfactory receptor 5J2
OR5K1	Olfactory receptor 5K1
OR5K2	Olfactory receptor 5K2
OR5K3	Olfactory receptor 5K3
OR5K4	Olfactory receptor 5K4
OR5L1	Olfactory receptor 5L1
OR5L2	Olfactory receptor 5L2
OR5M1	Olfactory receptor 5M1
OR5M10	Olfactory receptor 5M10
OR5M11	Olfactory receptor 5M11
OR5M3	Olfactory receptor 5M3
OR5M8	Olfactory receptor 5M8
OR5M9	Olfactory receptor 5M9
OR5P3	Olfactory receptor 5P3
OR5R1	Olfactory receptor 5R1
OR5T1	Olfactory receptor 5T1
OR5T2	Olfactory receptor 5T2
OR5T3	Olfactory receptor 5T3
OR5V1	Olfactory receptor 5V1
OR5W2	Olfactory receptor 5W2
OR6A2	Olfactory receptor 6A2
OR6B1	Olfactory receptor 6B1
OR6B2	Olfactory receptor 6B2
OR6B3	Olfactory receptor 6B3
OR6C1	Olfactory receptor 6C1
OR6C2	Olfactory receptor 6C2
OR6C3	Olfactory receptor 6C3
OR6C4	Olfactory receptor 6C4
OR6C6	Olfactory receptor 6C6
OR6C65	Olfactory receptor 6C65
OR6C68	Olfactory receptor 6C68
OR6C70	Olfactory receptor 6C70
OR6C74	Olfactory receptor 6C74
OR6C75	Olfactory receptor 6C75
OR6C76	Olfactory receptor 6C76
OR6K2	Olfactory receptor 6K2
OR6K3	Olfactory receptor 6K3
OR6K6	Olfactory receptor 6K6
OR6M1	Olfactory receptor 6M1
OR6N1	Olfactory receptor 6N1
OR6P1	Olfactory receptor 6P1
OR6Q1	Olfactory receptor 6Q1
OR6S1	Olfactory receptor 6S1
OR6T1	Olfactory receptor 6T1
OR6V1	Olfactory receptor 6V1
OR6X1	Olfactory receptor 6X1
OR6Y1	Olfactory receptor 6Y1
OR7A10	Olfactory receptor 7A10
OR7A17	Olfactory receptor 7A17
OR7A5	Olfactory receptor 7A5
OR7C1	Olfactory receptor 7C1
OR7C2	Olfactory receptor 7C2
OR7D4	Olfactory receptor 7D4

## Sheet: S7i - Pheromone
Table S7. Sensory genes (human)
Human gene symbol	Name (description)
TAAR1	Trace amine receptor 1 (GPCR, detects volatile amine odorants)
TAAR2	Trace amine receptor 2 (GPCR, detects volatile amine odorants)
TAAR3	Trace amine receptor 3 (Pseudogene in human)
TAAR4	Trace amine receptor 4 (Pseudogene in human)
TAAR5	Trace amine receptor 5 (GPCR, detects volatile amine odorants)
TAAR6	Trace amine receptor 6 (GPCR, detects volatile amine odorants)
TAAR7	Trace amine receptor 7 (Pseudogene in human)
TAAR8	Trace amine receptor 8 (GPCR, detects volatile amine odorants)
TAAR9	Trace amine receptor 9 (GPCR, detects volatile amine odorants)
VN1R1	Vomeronasal type-1 receptor 1 (Pheromone receptor)
VN1R2	Vomeronasal type-1 receptor 2 (Pheromone receptor)
VN1R3	Vomeronasal type-1 receptor 3 (Pheromone receptor)
VN1R4	Vomeronasal type-1 receptor 4 (Pheromone receptor)
VN1R5	Vomeronasal type-1 receptor 5 (Pheromone receptor)

## Sheet: S7j - Taste
Table S7. Sensory genes (human)
Human gene symbol	Name (description)
TAS1R1	Taste receptor, 1R1 (umami)
TAS1R2	Taste 1 receptor, member 2 (sweet)
TAS1R3	Taste 1 receptor, member 3 (co-receptor, sweet & umami)
PKD2L1	Polycystin 2 like 1 transient receptor potential cation channel (sour)
PKD1L3	Polycystin 2 like 1 transient receptor potential interacting channel (co-receptor, sour)
TAS2R1	Taste 2 receptor (bitter)
TAS2R10	Taste 2 receptor (bitter)
TAS2R13	Taste 2 receptor (bitter)
TAS2R14	Taste 2 receptor (bitter)
TAS2R16	Taste 2 receptor (bitter)
TAS2R19	Taste 2 receptor (bitter)
TAS2R20	Taste 2 receptor (bitter)
TAS2R3	Taste 2 receptor (bitter)
TAS2R30	Taste 2 receptor (bitter)
TAS2R31	Taste 2 receptor (bitter)
TAS2R38	Taste 2 receptor (bitter)
TAS2R39	Taste 2 receptor (bitter)
TAS2R4	Taste 2 receptor (bitter)
TAS2R40	Taste 2 receptor (bitter)
TAS2R41	Taste 2 receptor (bitter)
TAS2R42	Taste 2 receptor (bitter)
TAS2R43	Taste 2 receptor (bitter)
TAS2R45	Taste 2 receptor (bitter)
TAS2R46	Taste 2 receptor (bitter)
TAS2R5	Taste 2 receptor (bitter)
TAS2R50	Taste 2 receptor (bitter)
TAS2R60	Taste 2 receptor (bitter)
TAS2R7	Taste 2 receptor (bitter)
TAS2R8	Taste 2 receptor (bitter)
TAS2R9	Taste 2 receptor (bitter)

[truncated: 2 more sheets: S7k - K2P channel, S7l - Kv channel]
